# Supplementary material for: Hemarrest som alternativ påföljd för brott : En komparativ studie av svensk och amerikansk rätt
Source: Royal Society of Chemistry journal article supplement (doi:10.1039/d1dt03109k), 2014-01-01
Supplement: d1dt03109k1.pdf [file d1dt03109k1.pdf]

## Supplementary Information for

### The Structures of Ring-Expanded NHC supported Copper(I) Triphenylstannyls and Their Phenyl Transfer Reactivity Towards Heterocumulenes.

Rex S. C. Charman,<sup>a</sup> Mary F. Mahon<sup>a</sup>, John P. Lowe, and David J. Liptrot<sup>a,\*</sup>

<sup>a</sup>Department of Chemistry, University of Bath, Claverton Down, Bath, BA2 7AY UK.

|                                                                                                               |           |
|---------------------------------------------------------------------------------------------------------------|-----------|
| <b>Experimental details and characterisation</b>                                                              | <b>3</b>  |
| General considerations and starting materials                                                                 | 3         |
| Synthesis of compound <b>1</b> , (6-Mes)CuSnPh <sub>3</sub>                                                   | 3         |
| Synthesis of compound <b>2</b> , (6-Dipp)CuSnPh <sub>3</sub>                                                  | 3         |
| Synthesis of compound <b>3</b> , (7-Dipp)CuSnPh <sub>3</sub>                                                  | 4         |
| Reaction of <b>1</b> and di- <i>p</i> -tolylcarbodiimide                                                      | 4         |
| Reaction of 10 mol% of <b>1</b> with Ph <sub>3</sub> SnH and di- <i>p</i> -tolylcarbodiimide                  | 5         |
| Reaction of 10 mol% (6-Mes)CuO <sup>t</sup> Bu and Ph <sub>3</sub> SnH                                        | 5         |
| Reaction of <b>1</b> and PhNCO                                                                                | 5         |
| Reaction of IPrCuSnPh <sub>3</sub> and PhNCO                                                                  | 5         |
| Reaction of 10 mol% of <b>1</b> with Ph <sub>3</sub> SnH and PhNCO                                            | 5         |
| Reaction of <b>1</b> and PhNCS                                                                                | 6         |
| VT-NMR study of the reaction of <b>1</b> and PhNCO                                                            | 6         |
| VT-NMR study of the reaction of <b>1</b> and PhNCO                                                            | 6         |
| <b>X-ray Crystallography</b>                                                                                  | <b>7</b>  |
| Table 1. Crystal data and structure refinement details                                                        | 7         |
| <b>In situ reaction monitoring by NMR spectroscopy</b>                                                        | <b>8</b>  |
| Figures S1, S2: Reaction of (6-Mes)CuO <sup>t</sup> Bu and Ph <sub>3</sub> SnH                                | 8         |
| Figures S3, S4: Reaction of (6-Dipp)CuO <sup>t</sup> Bu and Ph <sub>3</sub> SnH                               | 9         |
| Figures S5, S6: Reaction of (7-Dipp)CuO <sup>t</sup> Bu and Ph <sub>3</sub> SnH                               | 10        |
| Figures S7, S8: Reaction of <b>1</b> and di- <i>p</i> -tolylcarbodiimide                                      | 11        |
| Figures S9, S10: Reaction of 10 mol% of <b>1</b> with Ph <sub>3</sub> SnH and di- <i>p</i> -tolylcarbodiimide | 12        |
| Figures S11, S12: Reaction of 10 mol% (6-Mes)CuO <sup>t</sup> Bu and Ph <sub>3</sub> SnH                      | 13        |
| Figures S13, S14: Reaction of <b>1</b> and PhNCO                                                              | 14        |
| Figures S15, S16: Reaction of IPrCuSnPh <sub>3</sub> and PhNCO                                                | 15        |
| Figures S17, S18: Reaction of 10 mol% of <b>1</b> with Ph <sub>3</sub> SnH and PhNCO                          | 16        |
| Figures S19-S21: Reaction of <b>1</b> with PhNCS                                                              | 17        |
| Figure S22: VT-NMR study of reaction of <b>1</b> and di- <i>p</i> -tolylcarbodiimide                          | 19        |
| Figure S23: VT-NMR study of reaction of <b>1</b> and PhNCO                                                    | 19        |
| <b>NMR Spectra of Compounds 1-3</b>                                                                           | <b>20</b> |
| Figures S24-S26: NMR spectra of compound <b>1</b>                                                             | 20        |
| Figures S27-S29: NMR spectra of compound <b>2</b>                                                             | 21        |
| Figures S30-S32: NMR spectra of compound <b>3</b>                                                             | 23        |
| <b>Mass Spectrometry Data</b>                                                                                 | <b>25</b> |
| Mass spectra of compounds <b>1-3</b>                                                                          | 26        |

|                                                                                      |           |
|--------------------------------------------------------------------------------------|-----------|
| Mass spectra of the reaction of <b>1</b> and di- <i>p</i> -tolylcarbodiimide         | <b>29</b> |
| Mass spectra of the reaction of <b>1</b> and PhNCO                                   | <b>31</b> |
| Mass spectrum of the reaction of IPrCuSnPh <sub>3</sub> and PhNCO                    | <b>33</b> |
| Mass spectrum of the reaction of 10 mol% <b>1</b> with Ph <sub>3</sub> SnH and PhNCO | <b>34</b> |
| Mass spectra of the reaction of <b>1</b> with PhNCS                                  | <b>35</b> |

|                   |           |
|-------------------|-----------|
| <b>References</b> | <b>37</b> |
|-------------------|-----------|

## Experimental

### General Considerations and Starting Materials

All reactions dealing with air- and moisture-sensitive compounds were carried out under argon atmosphere using standard Schlenk line and glovebox techniques. NMR experiments using air sensitive compounds were conducted in J. Young's tap NMR tubes prepared and sealed in a glovebox under argon. Toluene and hexane were purified using an MBraun Solvent Purification System and stored over 4Å molecular sieves. C<sub>6</sub>D<sub>6</sub> and d<sub>8</sub>-toluene were dried over a potassium mirror prior to vacuum transfer into a sealed ampoule and stored in a glove box under argon. All NMR data, unless otherwise stated, were acquired at 298 K on an Agilent ProPulse or Bruker Avance II+ instrument for <sup>1</sup>H (500 MHz), <sup>13</sup>C{<sup>1</sup>H} (126 MHz) and <sup>119</sup>Sn (186 MHz). <sup>1</sup>H and <sup>13</sup>C NMR spectra were referenced using residual solvent resonances. Mass spectrometry was performed using a Bruker MicrOTOF Electrospray Time-Of-Flight Mass Spectrometer coupled to an Agilent High Performance Liquid Chromatography unit. (6-Mes)CuO<sup>t</sup>Bu, (6-Dipp)CuO<sup>t</sup>Bu, and (7-Dipp)CuO<sup>t</sup>Bu were prepared according to literature procedures.<sup>1</sup>

### Synthesis of compound 1, (6-Mes)CuSnPh<sub>3</sub>

A solution of Ph<sub>3</sub>SnH (168 µL, 0.66 mmol) in toluene (10 mL) was added to a stirring suspension of (6-Mes)CuO<sup>t</sup>Bu (300 mg, 0.66 mmol) in toluene (30 mL) forming a yellow solution. The reaction mixture was left stirring for 1 hour before volatiles were removed *in vacuo* leaving a yellow powder of **1**. Yield 0.403 g (84 %). Single crystals were grown in the glovebox from a saturated solution of **1** in toluene with slow hexane-diffusion.

<sup>1</sup>H NMR (500 MHz, C<sub>6</sub>D<sub>6</sub>) δ 7.66 – 7.58 (m, 6H, SnArH<sub>meta</sub>), 7.28 – 7.17 (m, 3H, SnArH<sub>para</sub>), 6.75 (s, 4H, meta-H), 2.45 (t, *J* = 5.9 Hz, 4H, NCH<sub>2</sub>), 2.17 (s, 6H, para-CH<sub>3</sub>), 2.06 (s, 12H, ortho-CH<sub>3</sub>), 1.29 (p, *J* = 5.8 Hz, 2H, NCH<sub>2</sub>CH<sub>2</sub>). <sup>13</sup>C NMR (126 MHz, C<sub>6</sub>D<sub>6</sub>) δ 201.4 (CuC<sub>ipso</sub>), 151.6 (SnArC<sub>ipso</sub>), 141.7 (Ar-C), 138.7 (Ar-C), 138.3 (Ar-C), 134.9 (Ar-C), 130.0 (Ar-C), 127.6 (Ar-C), 126.4 (Ar-C), 43.4 (NCH<sub>2</sub>), 21.1 (para-CH<sub>3</sub>), 20.5 (NCH<sub>2</sub>CH<sub>2</sub>), 18.2 (ortho-CH<sub>3</sub>). <sup>119</sup>Sn NMR (186 MHz, C<sub>6</sub>D<sub>6</sub>) δ -79.1. MS (ESI) Expected: 734.17, found: 729.1762 [M]<sup>+</sup> (err [ppm] = -1.86). Analysis calculated for C<sub>40</sub>H<sub>43</sub>CuN<sub>2</sub>Sn (MW = 734.05 g/mol): Expected: C, 65.45; H, 5.9; N, 3.82 %. Found: C, 62.58; H, 5.61; N, 3.65 %. Despite repeated attempts, we were unable to obtain satisfactory elemental analysis for this compound. This is most likely due to the compound's high sensitivity towards air and moisture and the presence of residual elemental tin.

### Synthesis of compound 2, (6-Dipp)CuSnPh<sub>3</sub>

A solution of Ph<sub>3</sub>SnH (142 µL, 0.55 mmol) in toluene (10 mL) was added to a stirring suspension of (6-Dipp)CuO<sup>t</sup>Bu (300 mg, 0.55 mmol) in toluene (30 mL) forming a yellow solution. The reaction mixture was left stirring for 1 hour before volatiles were removed *in vacuo* leaving a yellow powder of **2**. Yield 0.357 g (79 %). Single crystals were grown in a saturated solution of **2** in toluene at -18 °C.

<sup>1</sup>H NMR (500 MHz, C<sub>6</sub>D<sub>6</sub>) δ 7.57 – 7.47 (m, 6H, SnArH<sub>meta</sub>), 7.26 – 7.17 (m, 11H, SnArH<sub>ortho</sub>, SnArH<sub>para</sub>, para-H), 7.06 (d, *J* = 7.8 Hz, 4H, meta-H), 2.94 (hept, *J* = 6.8 Hz, 4H, CH(CH<sub>3</sub>)<sub>2</sub>), 2.65 (t, *J* = 5.7 Hz, 4H, NCH<sub>2</sub>), 1.42 (p, *J* = 5.6 Hz, 2H, NCH<sub>2</sub>CH<sub>2</sub>), 1.30 (d, *J* = 6.8 Hz, 12H, CH(CH<sub>3</sub>)<sub>2</sub>), 1.13 (d, *J* = 6.9 Hz, 12H,

CH(CH<sub>3</sub>)<sub>2</sub>). <sup>13</sup>C NMR (126 MHz, C<sub>6</sub>D<sub>6</sub>) δ 201.3 (CuC<sub>ipso</sub>), 151.2 (SnArC<sub>ipso</sub>), 145.9 (Ar-C), 141.1 (Ar-C), 138.7 (Ar-C), 137.9 (Ar-C), 129.6 (Ar-C), 129.2 (Ar-C), 127.5 (Ar-C), 126.3 (Ar-C), 124.9 (Ar-C), 45.8 (NCH<sub>2</sub>), 28.9 (CH(CH<sub>3</sub>)<sub>2</sub>), 25.4 (CH(CH<sub>3</sub>)<sub>2</sub>), 24.6 (CH(CH<sub>3</sub>)<sub>2</sub>), 20.2 (NCH<sub>2</sub>CH<sub>2</sub>). <sup>119</sup>Sn NMR (186 MHz, C<sub>6</sub>D<sub>6</sub>) δ -83.1. MS (ESI) Expected: 818.27, found: 819.2915 [M+H]<sup>+</sup> (err [ppm] = -3.28). Analysis calculated for C<sub>46</sub>H<sub>55</sub>CuN<sub>2</sub>Sn (MW = 818.22 g/mol): Expected: C, 67.55; H, 6.78; N, 3.42 %. Found: C, 66.33; H, 6.66; N, 3.40 %. Despite repeated attempts, we were unable to obtain satisfactory elemental analysis for this compound. This is most likely due to the compound's high sensitivity towards air and moisture and the presence of residual elemental tin.

### Synthesis of compound 3, (7-Dipp)CuSnPh<sub>3</sub>

A solution of Ph<sub>3</sub>SnH (92 μL, 0.36 mmol) in toluene (10 mL) was added to a stirring suspension of (7-Dipp)CuO<sup>t</sup>Bu (200 mg, 0.36 mmol) in toluene (30 mL) forming a yellow solution. The reaction mixture was left stirring for 1 hour before volatiles were removed *in vacuo* leaving a beige powder of **3**. Yield 0.231 g (77 %). Single crystals were grown in a saturated solution of **3** in toluene at -18 °C.

<sup>1</sup>H NMR (500 MHz, C<sub>6</sub>D<sub>6</sub>) δ 7.58 – 7.45 (m, 6H, SnArH<sub>meta</sub>), 7.26 – 7.20 (m, 9H, SnArH<sub>ortho</sub>, SnArH<sub>para</sub>), 7.11 – 7.07 (m, 2H, *para*-H), 7.05 (d, *J* = 7.7 Hz, 4H, *meta*-H), 3.25 – 3.19 (m, 4H, NCH<sub>2</sub>), 3.13 (hept, *J* = 6.9 Hz, 4H, CH(CH<sub>3</sub>)<sub>2</sub>), 1.62 – 1.57 (m, 4H, NCH<sub>2</sub>CH<sub>2</sub>), 1.30 (d, *J* = 6.9 Hz, 12H, CH(CH<sub>3</sub>)<sub>2</sub>), 1.14 (d, *J* = 6.9 Hz, 12H, CH(CH<sub>3</sub>)<sub>2</sub>). <sup>13</sup>C NMR (126 MHz, C<sub>6</sub>D<sub>6</sub>) δ 213.3 (CuC<sub>ipso</sub>), 150.8 (SnArC<sub>ipso</sub>), 144.8 (Ar-C), 143.3 (Ar-C), 138.4 (Ar-C), 137.5 (Ar-C), 128.9 (Ar-C), 128.8 (Ar-C), 127.0 (Ar-C), 125.9 (Ar-C), 124.7 (Ar-C), 53.2 (NCH<sub>2</sub>), 28.6 (CH(CH<sub>3</sub>)<sub>2</sub>), 24.9 (CH(CH<sub>3</sub>)<sub>2</sub>), 24.8 (NCH<sub>2</sub>CH<sub>2</sub>), 24.3 (CH(CH<sub>3</sub>)<sub>2</sub>). <sup>119</sup>Sn NMR (186 MHz, C<sub>6</sub>D<sub>6</sub>) δ -85.4. MS (ESI) Expected: 832.28, found: 877.2804 [M+HCOO]<sup>-</sup> (err [ppm] = -2.90). Due to the failed attempts to obtain satisfactory elemental analysis for compounds **1** and **2**, elemental analysis for compound **3** was not attempted.

### Reaction of 1 and di-*p*-tolylcarbodiimide

In a vial in a glovebox, a solution of di-*p*-tolylcarbodiimide (3.3 mg, 15 μmol) in C<sub>6</sub>D<sub>6</sub> (0.5 mL) was added to **1** (11 mg, 15 μmol) forming a pale yellow solution. The reaction mixture was transferred to J. Young's tap NMR tube and <sup>1</sup>H and <sup>119</sup>Sn NMR was taken after 30 minutes. An aliquot of the reaction was then taken and diluted in acetonitrile (1 mL) for investigation by mass spectrometry. The reaction was repeated and immediately quenched in wet acetonitrile (1 mL) for investigation by mass spectrometry.

<sup>1</sup>H NMR (500 MHz, C<sub>6</sub>D<sub>6</sub>) δ 7.05-7.03 (m, 5H, Ar-H), 6.76 (s, 4H, *meta*-CH<sub>3</sub>), 6.61 (s, 8H, Ar-H), 2.51 (t, *J* = 5.9 Hz, 4H, NCH<sub>2</sub>), 2.44 (t, *J* = 5.9 Hz, \* = *ca.* 38 % contaminated with compound **1**), 2.18 (s, 12H, *ortho*-CH<sub>3</sub>), 2.11 (s, 6H, *para*-CH<sub>3</sub>), 2.06 (s, 6H, *para*-CH<sub>3</sub>), 1.33 (p, *J* = 5.7 Hz, 2H, NCH<sub>2</sub>CH<sub>2</sub>). MS (ESI) Expected for HN(*p*-Tol)C(=N-*p*-Tol)Ph: 300.16, found: 301.1703 [M+H]<sup>+</sup> (err [ppm] = 1.09).

After immediate quenching in wet acetonitrile: MS (ESI) Expected for HN(*p*-Tol)C(=N-*p*-Tol)SnPh<sub>3</sub>: 574.14, found: 575.1494 [M+H]<sup>+</sup> (err [ppm] = -3.07).

### Reaction of 10 mol% of **1** with Ph<sub>3</sub>SnH and di-*p*-tolylcarbodiimide

In a vial in a glovebox, a solution of di-*p*-tolylcarbodiimide (15 mg, 68 μmol) in C<sub>6</sub>D<sub>6</sub> (0.5 mL) was added to **1** (5 mg, 6.8 μmol) forming a pale yellow solution. Ph<sub>3</sub>SnH (17 μL, 68 μmol) was then immediately added forming a brown solution. The reaction mixture was transferred to J. Young's tap NMR tube and <sup>1</sup>H and <sup>119</sup>Sn NMR was taken after 30 minutes.

### Reaction of 10 mol% (6-Mes)CuO<sup>t</sup>Bu and Ph<sub>3</sub>SnH

In a J. Young's tap NMR tube vial in a glovebox, Ph<sub>3</sub>SnH (110 μL, 440 μmol) was added to a solution of (6-Mes)CuO<sup>t</sup>Bu (20 mg, 44 μmol) in C<sub>6</sub>D<sub>6</sub> (0.5 mL). Immediate bubbling was observed with concomitant formation of a cream precipitate. <sup>1</sup>H and <sup>119</sup>Sn NMR was taken after 30 minutes.

### Reaction of **1** and PhNCO

In a vial in a glovebox, a solution of PhNCO (2.7 μL, 25 μmol) in C<sub>6</sub>D<sub>6</sub> (0.5 mL) was added to **1** (18 mg, 25 μmol) forming a pale yellow solution. The reaction mixture was transferred to J. Young's tap NMR tube and <sup>1</sup>H and <sup>119</sup>Sn NMR was taken after 30 minutes. An aliquot of the reaction was then taken and diluted in acetonitrile (1 mL) for investigation by mass spectrometry. The reaction was repeated and immediately quenched in wet acetonitrile (1 mL) for investigation by mass spectrometry.

<sup>1</sup>H NMR (500 MHz, C<sub>6</sub>D<sub>6</sub>) δ 7.18 – 7.07 (m, 16H, Ar-H with solvent peak included), 6.75 (s, 4H, *meta*-CH<sub>3</sub>), 2.29 (t, *J* = 5.8 Hz, 4H, NCH<sub>2</sub>), 2.09 (s, 6H, *para*-CH<sub>3</sub>), 1.80 (s, 12H, *ortho*-CH<sub>3</sub>), 1.13 (p, *J* = 6.1 Hz, 2H, NCH<sub>2</sub>CH<sub>2</sub>). MS (ESI) Expected for PhN(H)C(O)Ph: 197.08, found: 198.0914 [M+H]<sup>+</sup> (err [ppm] = 0.49).

After immediate quenching in wet acetonitrile: MS (ESI) Expected for PhN(H)C(O)SnPh<sub>3</sub>: 471.06, found: 494.0531 [M+Na]<sup>+</sup> (err [ppm] = 0.76).

### Reaction of IPrCuSnPh<sub>3</sub> and PhNCO

In a vial in a glovebox, a solution of PhNCO (2.7 μL, 25 μmol) in C<sub>6</sub>D<sub>6</sub> (0.5 mL) was added to IPrCuSnPh<sub>3</sub> (20 mg, 25 μmol) forming a pale yellow solution. The reaction mixture was transferred to J. Young's tap NMR tube and <sup>1</sup>H and <sup>119</sup>Sn NMR was taken after overnight. An aliquot of the reaction was diluted in acetonitrile (1 mL) and investigated by mass spectrometry.

<sup>1</sup>H NMR (500 MHz, C<sub>6</sub>D<sub>6</sub>) δ 7.28 – 7.24 (m, 11H, Ar-H), 7.08-7.06 (m, *J* = 7.8 Hz, 6H, *para*-H), 6.26 (s, 2H, NCH<sub>2</sub>), 2.53 (hept, *J* = 7.0 Hz, 6H, CH(CH<sub>3</sub>)<sub>2</sub>), 1.29 (d, *J* = 6.9 Hz, 3H, *ca.* 28 % contaminated with IPrCuSnPh<sub>3</sub>), 1.22 (d, *J* = 6.9 Hz, 12H, CH(CH<sub>3</sub>)<sub>2</sub>), 1.04 (d, *J* = 6.9 Hz, 13H, CH(CH<sub>3</sub>)<sub>2</sub>). MS (ESI) Expected for PhN(H)C(O)Ph: 197.08, found: 198.0914 [M+H]<sup>+</sup> (err [ppm] = 0.47).

### Reaction of 10 mol% of **1** with Ph<sub>3</sub>SnH and PhNCO

In a vial in a glovebox, a PhNCO (7.4 μL, 68 μmol) was added to a solution of **1** (5 mg, 6.8 mmol) in C<sub>6</sub>D<sub>6</sub> forming a pale yellow solution. Ph<sub>3</sub>SnH (17.5 μL, 68 μmol) was then immediately added with no change in appearance. The reaction mixture was transferred to J. Young's tap NMR tube and heated

overnight at 40 °C forming a colourless solution.  $^1\text{H}$  and  $^{119}\text{Sn}$  NMR was taken and an aliquot of the reaction was diluted in acetonitrile (1 mL) for investigation by mass spectrometry.

MS (ESI) Expected for  $(\text{PhNCO})_3$ : 357.11, found: 358.1188  $[\text{M}+\text{H}]^+$  (err [ppm] = 0.29).

### Reaction of **1** and PhNCS

In a vial in a glovebox, a solution of PhNCS (2.9  $\mu\text{L}$ , 25  $\mu\text{mol}$ ) in  $\text{C}_6\text{D}_6$  (0.5 mL) was added to **1** (18 mg, 25  $\mu\text{mol}$ ) forming a yellow solution. The reaction mixture was transferred to J. Young's tap NMR tube and monitored by  $^1\text{H}$  and  $^{119}\text{Sn}$  NMR spectroscopy after 30 minutes and overnight. An orange solution had formed overnight. Aliquots of the reaction were taken after 30 minutes and overnight. Each aliquot was diluted in acetonitrile (1 mL) for investigation by mass spectrometry.

$^1\text{H}$  NMR (500 MHz,  $\text{C}_6\text{D}_6$ )  $\delta$  7.14 (s, 10H, Ar-H), 6.80 (s, 4H, *meta*-H), 2.60 (t,  $J$  = 5.9 Hz, 4H,  $\text{NCH}_2$ ), 2.31 (s, 12H, *ortho*- $\text{CH}_3$ ), 2.17 (s, 6H, *para*- $\text{CH}_3$ ), 1.45 (p,  $J$  = 5.7 Hz, 2H,  $\text{NCH}_2\text{CH}_2$ ). MS (ESI) Expected for  $\text{PhN}(\text{H})\text{C}(\text{S})\text{Ph}$ : 213.06, found: 212.0541  $[\text{M}-\text{H}]^-$  (err [ppm] = 0.48).

After 30 minutes: MS (ESI) Expected for  $\text{PhN}(\text{H})\text{C}(\text{S})\text{SnPh}_3$ : 487.04, found: 488.0491  $[\text{M}+\text{H}]^+$  (err [ppm] = 4.25).

### VT-NMR study of reaction of **1** and di-*p*-tolylcarbodiimide

In a vial in a glovebox, a solution of di-*p*-tolylcarbodiimide (9.7 mg, 44  $\mu\text{mol}$ ) in  $\text{d}_8$ -toluene (0.5 mL) was added to **1** (32 mg, 44  $\mu\text{mol}$ ) forming a pale yellow solution. The solution was immediately frozen in liquid nitrogen and allowed to thaw in the NMR spectrometer at -50 °C.  $^1\text{H}$  and  $^{119}\text{Sn}$  NMR were taken after 15, 30, and 45 minutes.

### VT-NMR study of reaction of **1** and PhNCO

In a vial in a glovebox, PhNCO (4.7  $\mu\text{L}$ , 44  $\mu\text{mol}$ ) was added to **1** (32 mg, 44  $\mu\text{mol}$ ) in  $\text{d}_8$ -toluene (0.5 mL) forming a pale yellow solution. The solution was immediately frozen in liquid nitrogen and allowed to thaw in the NMR spectrometer at -50 °C and was heated to -25, 0, and 25 °C. The reaction was monitored by  $^{119}\text{Sn}$  NMR at each temperature interval.

## X-ray crystallography

The crystals were kept at 150.00(10) K during data collection. Compounds **1** and **2** (CCDC numbers: ) were collected with a New Xcalibur EosS2 diffractometer with Mo source ( $\lambda = 0.71073$ ). Compound **3** (CCDC numbers: ) was collected on RIGAKU SuperNova with Cu source ( $\lambda = 1.54184$ ). Using Olex2,<sup>2</sup> the structures were solved with the SHELXT<sup>3</sup> and refined with the ShelXL<sup>3</sup> refinement package using Least Squares minimisation.

**Table S1.** Crystal data and structure refinement details

| Identification code                                                                                | (1)                                                                 | (2)                                                                 | (3)                                                                 |
|----------------------------------------------------------------------------------------------------|---------------------------------------------------------------------|---------------------------------------------------------------------|---------------------------------------------------------------------|
| Empirical formula                                                                                  | C <sub>40</sub> H <sub>43</sub> CuN <sub>2</sub> Sn                 | C <sub>46</sub> H <sub>55</sub> CuN <sub>2</sub> Sn                 | C <sub>47</sub> H <sub>57</sub> CuN <sub>2</sub> Sn                 |
| Formula weight                                                                                     | 733.99                                                              | 818.15                                                              | 832.17                                                              |
| Crystal system                                                                                     | monoclinic                                                          | orthorhombic                                                        | orthorhombic                                                        |
| Space group                                                                                        | <i>P</i> 2 <sub>1</sub> / <i>n</i>                                  | <i>P</i> 2 <sub>1</sub> 2 <sub>1</sub> 2 <sub>1</sub>               | <i>P</i> 2 <sub>1</sub> 2 <sub>1</sub> 2 <sub>1</sub>               |
| <i>a</i> / Å                                                                                       | 9.1870(2)                                                           | 11.9889(3)                                                          | 12.30344(5)                                                         |
| <i>b</i> / Å                                                                                       | 20.1121(4)                                                          | 17.2083(4)                                                          | 16.99760(6)                                                         |
| <i>c</i> / Å                                                                                       | 19.8588(5)                                                          | 20.1914(4)                                                          | 20.11837(7)                                                         |
| $\alpha$ / °                                                                                       | 90                                                                  | 90                                                                  | 90                                                                  |
| $\beta$ / °                                                                                        | 101.834(2)                                                          | 90                                                                  | 90                                                                  |
| $\gamma$ / °                                                                                       | 90                                                                  | 90                                                                  | 90                                                                  |
| Volume/ Å <sup>3</sup>                                                                             | 3591.32(14)                                                         | 4165.66(16)                                                         | 4207.33(3)                                                          |
| <i>Z</i>                                                                                           | 4                                                                   | 4                                                                   | 4                                                                   |
| $\rho_{\text{calc}}$ / g cm <sup>-3</sup>                                                          | 1.358                                                               | 1.305                                                               | 1.314                                                               |
| $\mu$ / mm <sup>-1</sup>                                                                           | 1.316                                                               | 1.142                                                               | 5.579                                                               |
| <i>F</i> (000)                                                                                     | 1504.0                                                              | 1696.0                                                              | 1728.0                                                              |
| Crystal size/ mm <sup>3</sup>                                                                      | 0.469 × 0.39 × 0.17                                                 | 0.324 × 0.307 × 0.117                                               | 0.374 × 0.187 × 0.157                                               |
| Radiation                                                                                          | MoK $\alpha$ ( $\lambda = 0.71073$ )                                | MoK $\alpha$ ( $\lambda = 0.71073$ )                                | CuK $\alpha$ ( $\lambda = 1.54184$ )                                |
| 2 $\theta$ range for data collection/°                                                             | 5.83 to 58.256                                                      | 5.782 to 60.782                                                     | 8.424 to 145.948                                                    |
| Index ranges                                                                                       | -12 ≤ <i>h</i> ≤ 12,<br>-27 ≤ <i>k</i> ≤ 26,<br>-26 ≤ <i>l</i> ≤ 26 | -17 ≤ <i>h</i> ≤ 15,<br>-24 ≤ <i>k</i> ≤ 23,<br>-28 ≤ <i>l</i> ≤ 26 | -15 ≤ <i>h</i> ≤ 14,<br>-21 ≤ <i>k</i> ≤ 20,<br>-18 ≤ <i>l</i> ≤ 24 |
| Reflections collected                                                                              | 36134                                                               | 41049                                                               | 59896                                                               |
| Independent reflections, <i>R</i> <sub>int</sub>                                                   | 9300, 0.0298                                                        | 11265, 0.0291                                                       | 8355, 0.0222                                                        |
| Data/restraints/parameters                                                                         | 9300/0/403                                                          | 11265/0/459                                                         | 8355/0/468                                                          |
| Goodness-of-fit on <i>F</i> <sup>2</sup>                                                           | 1.147                                                               | 1.061                                                               | 1.086                                                               |
| Final <i>R</i> <sub>1</sub> , <i>wR</i> <sub>2</sub> indexes [ <i>I</i> ≥ 2 $\sigma$ ( <i>I</i> )] | 0.0416, 0.0840                                                      | 0.0293, 0.0646                                                      | 0.0177, 0.0461                                                      |
| Final <i>R</i> <sub>1</sub> , <i>wR</i> <sub>2</sub> indexes [all data]                            | 0.0573, 0.0895                                                      | 0.0368, 0.0679                                                      | 0.0178, 0.0461                                                      |
| Largest diff. peak/hole / e Å <sup>-3</sup>                                                        | 0.92/-0.73                                                          | 0.66/-0.41                                                          | 0.42/-0.35                                                          |
| Flack parameter                                                                                    | –                                                                   | -0.009(5)                                                           | -0.0103(10)                                                         |

## In situ reaction monitoring by NMR spectroscopy

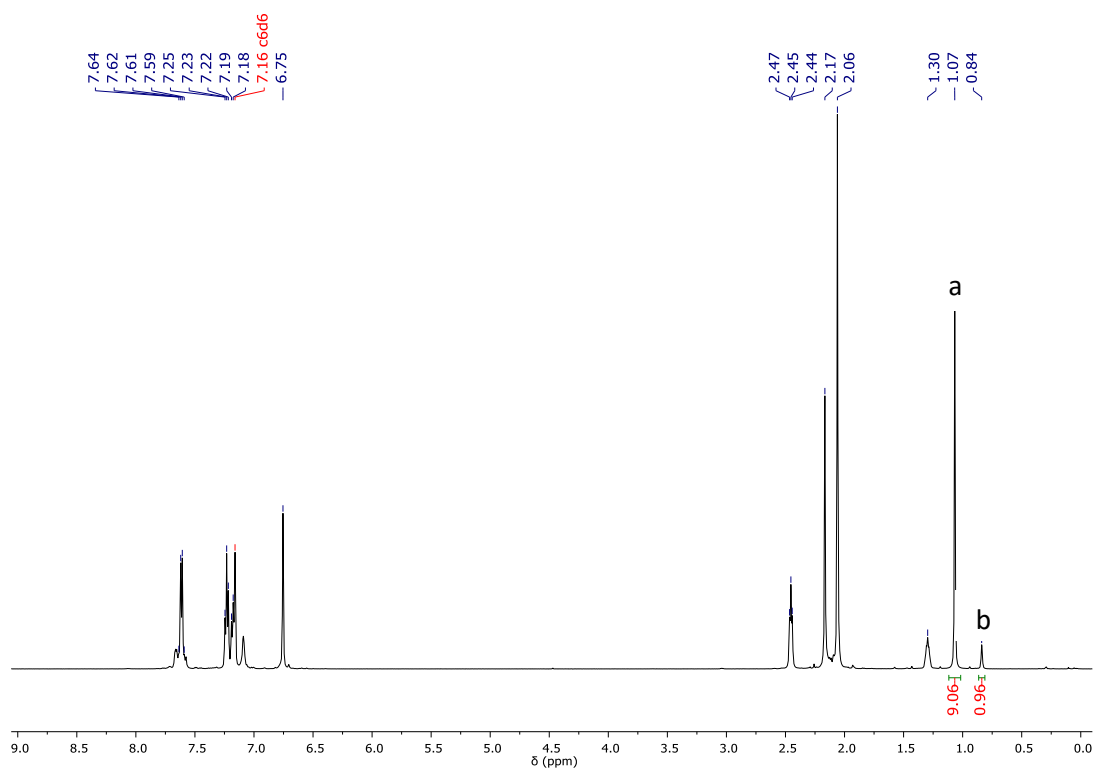

**Figure S1.** The <sup>1</sup>H NMR spectrum (500 MHz, C<sub>6</sub>D<sub>6</sub>) of the reaction between (6-Mes)CuO<sup>t</sup>Bu and Ph<sub>3</sub>SnH after 30 minutes. **a**, HO<sup>t</sup>Bu; **b**, HO<sup>t</sup>Bu

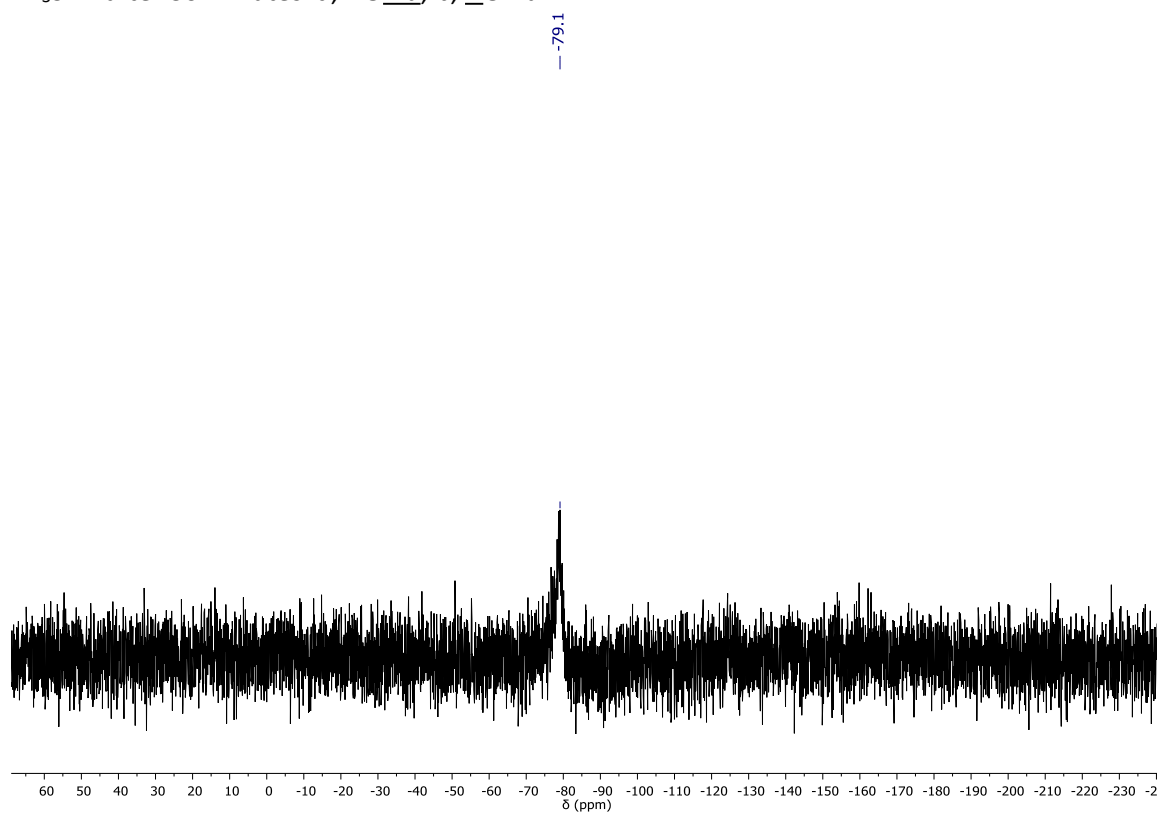

**Figure S2.** The <sup>119</sup>Sn NMR spectrum (186 MHz, C<sub>6</sub>D<sub>6</sub>) of the reaction between (6-Mes)CuO<sup>t</sup>Bu and Ph<sub>3</sub>SnH after 30 minutes.



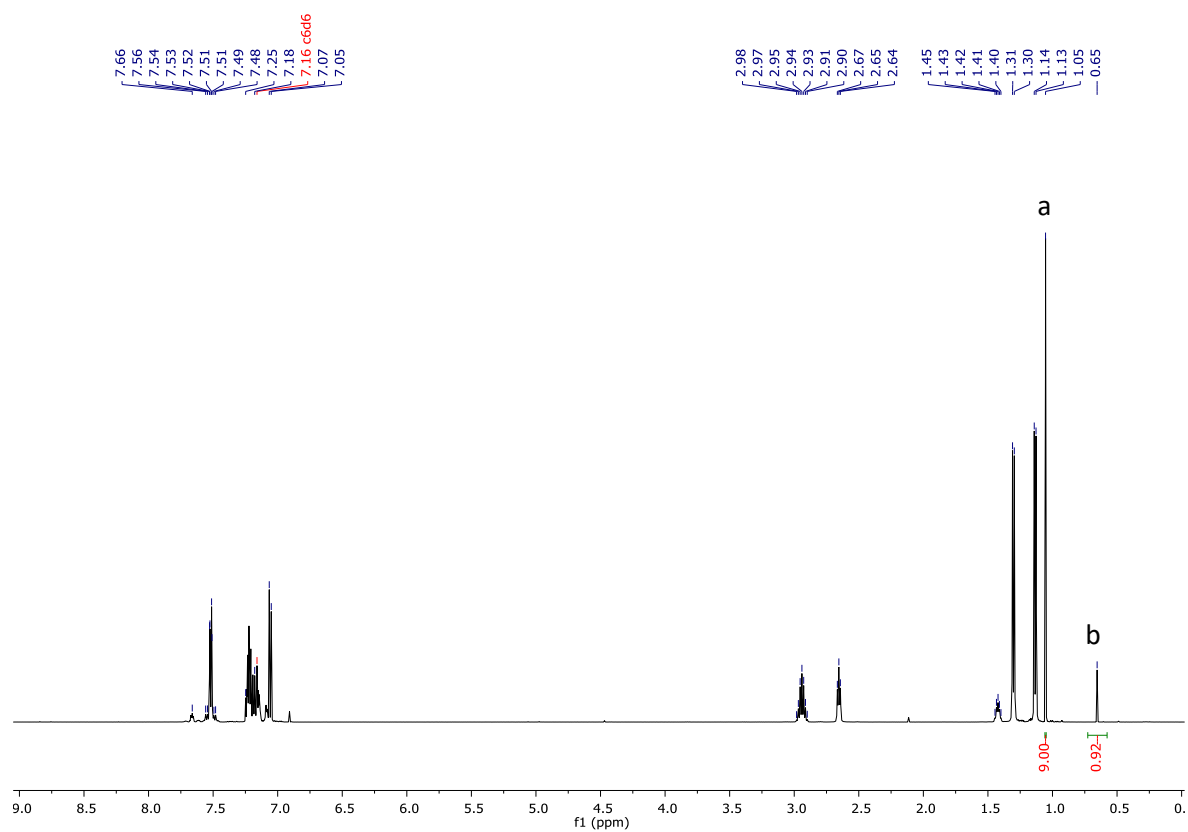

**Figure S3.** The  $^1\text{H}$  NMR spectrum (500 MHz,  $\text{C}_6\text{D}_6$ ) of the reaction between (6-Dipp) $\text{CuO}^t\text{Bu}$  and  $\text{Ph}_3\text{SnH}$  after 30 minutes. **a**,  $\text{HO}^t\text{Bu}$ ; **b**,  $\text{HO}^t\text{Bu}$

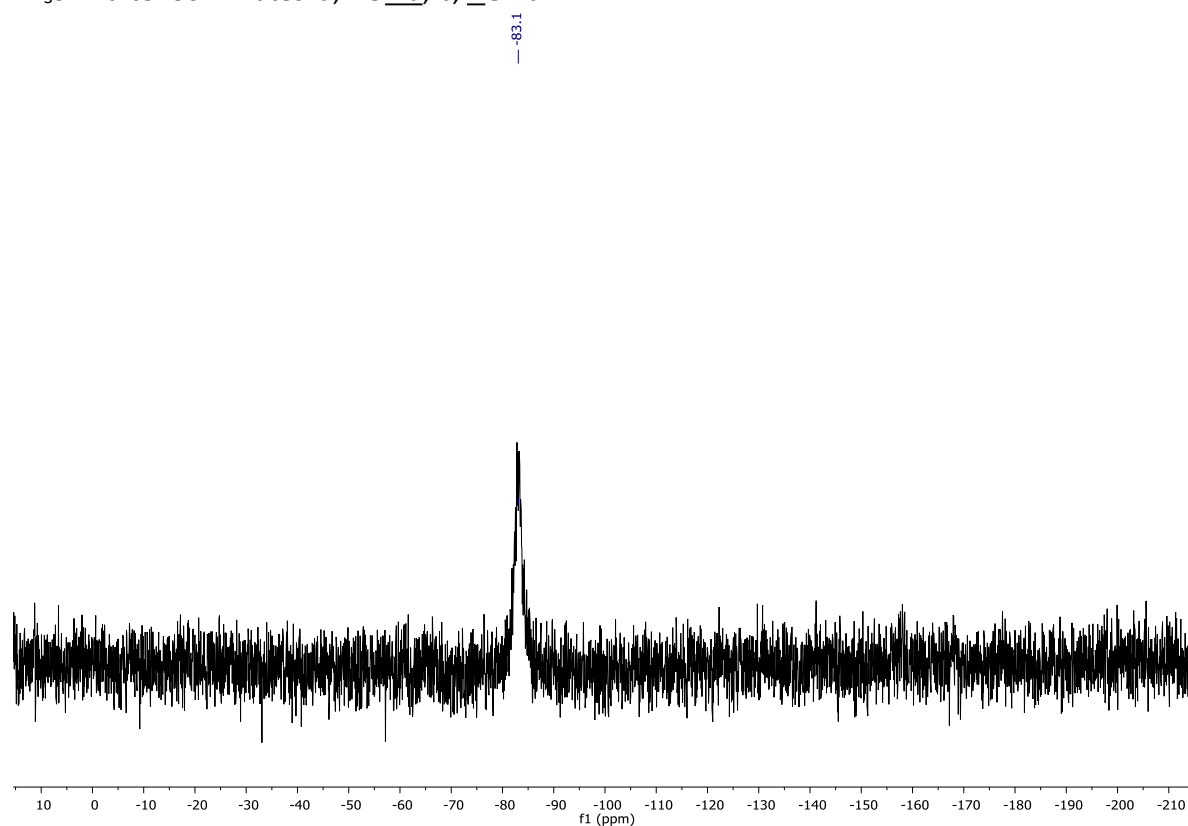

**Figure S4.** The  $^{119}\text{Sn}$  NMR spectrum (186 MHz,  $\text{C}_6\text{D}_6$ ) of the reaction between (6-Dipp) $\text{CuO}^t\text{Bu}$  and  $\text{Ph}_3\text{SnH}$  after 30 minutes.

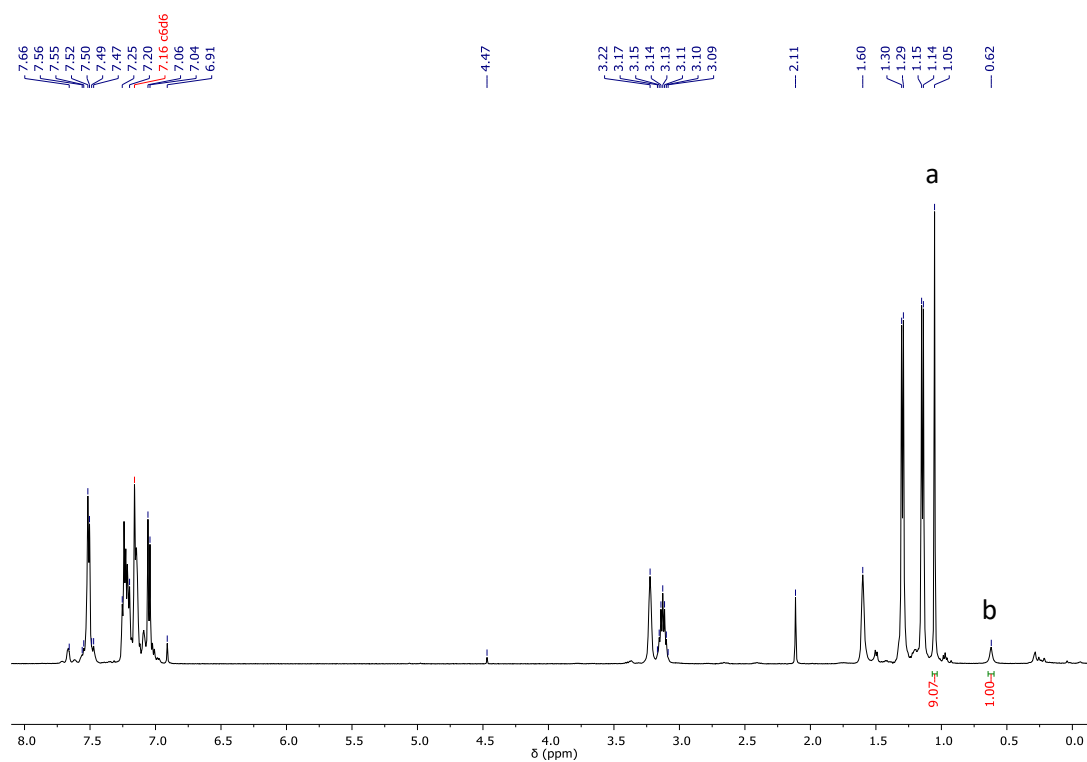

**Figure S5.** The  $^1\text{H}$  NMR spectrum (500 MHz,  $\text{C}_6\text{D}_6$ ) of the reaction between (7-Dipp) $\text{CuO}^t\text{Bu}$  and  $\text{Ph}_3\text{SnH}$  after 30 minutes. **a**,  $\text{HO}^t\text{Bu}$ ; **b**,  $\text{HO}^t\text{Bu}$

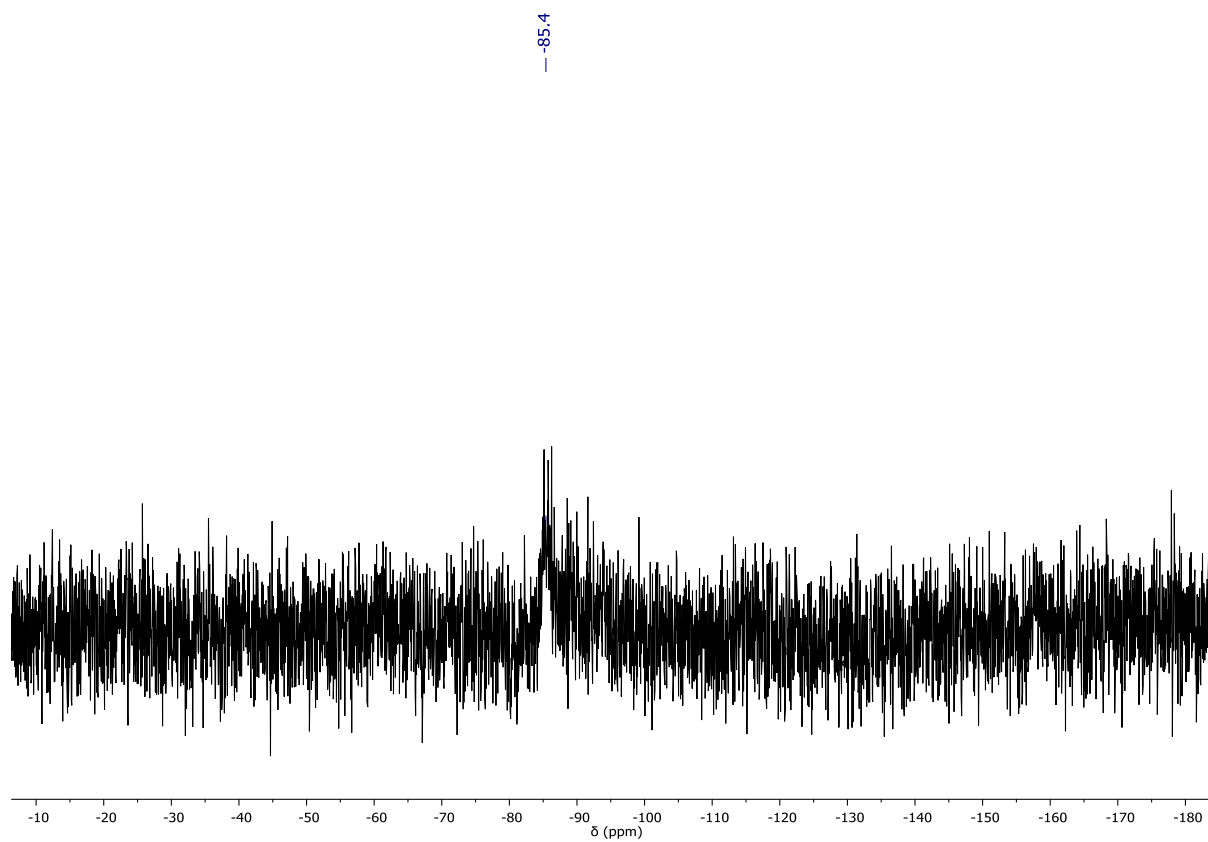

**Figure S6.** The  $^{119}\text{Sn}$  NMR spectrum (186 MHz,  $\text{C}_6\text{D}_6$ ) of the reaction between (7-Dipp) $\text{CuO}^t\text{Bu}$  and  $\text{Ph}_3\text{SnH}$  after 30 minutes.

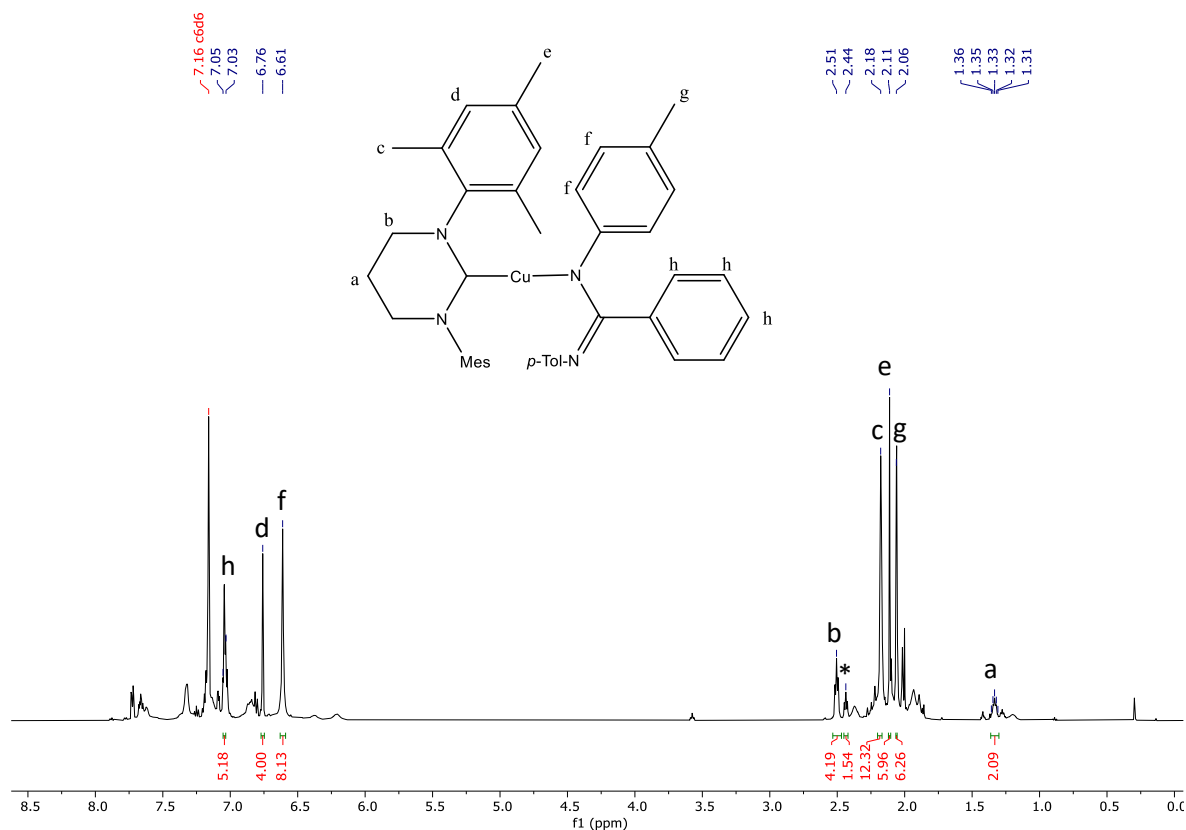

**Figure S7.** The  $^1\text{H}$  NMR spectrum (500 MHz,  $\text{C}_6\text{D}_6$ ) of the reaction between **1** and di-*p*-tolylcarbodiimide after 30 minutes. **a**,  $\text{NCH}_2\text{CH}_2$ ; **b**,  $\text{NCH}_2$ ; **c**, *ortho*- $\text{CH}_3$ ; **d**, *meta*- $\text{CH}_3$ ; **e**, *para*- $\text{CH}_3$ ; **f**, Ar-H; **g**, *para*- $\text{CH}_3$ ; **h**, Ar-H; \* = ca. 38 % contaminated with compound **1**.

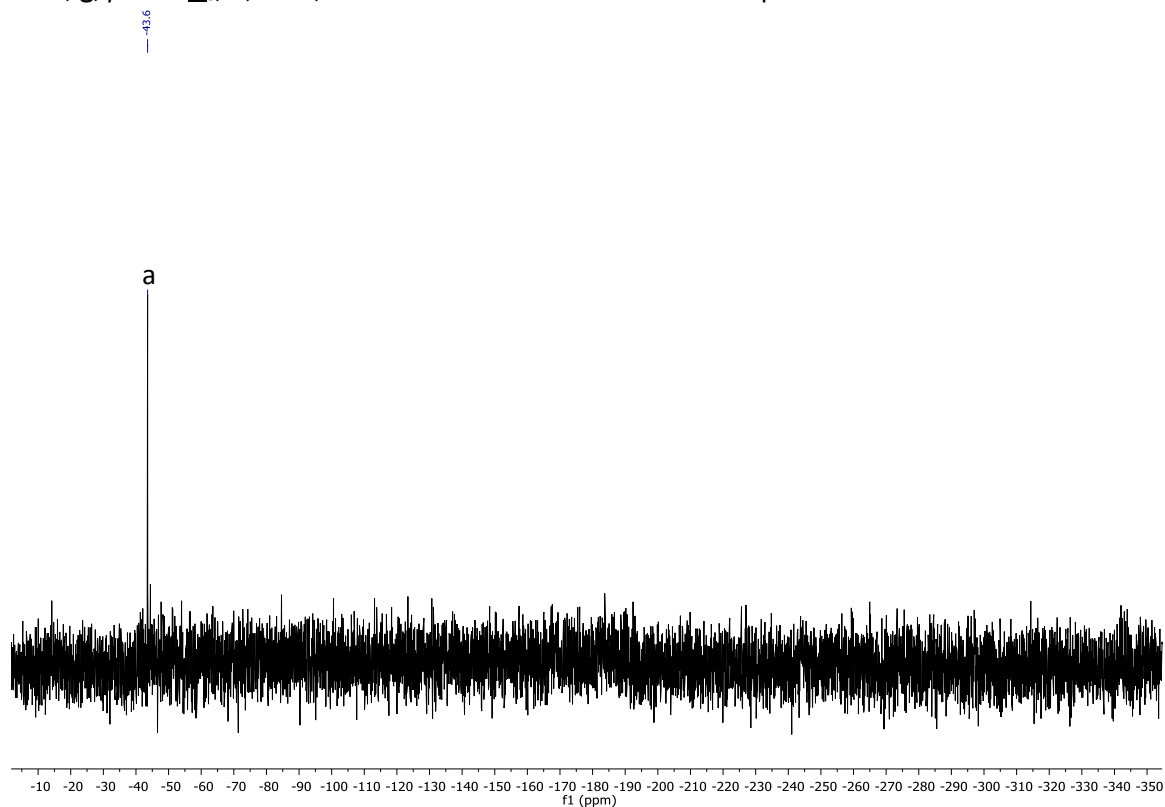

**Figure S8.** The  $^{119}\text{Sn}\{^1\text{H}\}$  NMR spectrum (186 MHz,  $\text{C}_6\text{D}_6$ ) of the reaction between **1** and di-*p*-tolylcarbodiimide after 30 minutes. **a**, " $\text{Ph}_2\text{Sn}$ ".<sup>4</sup>

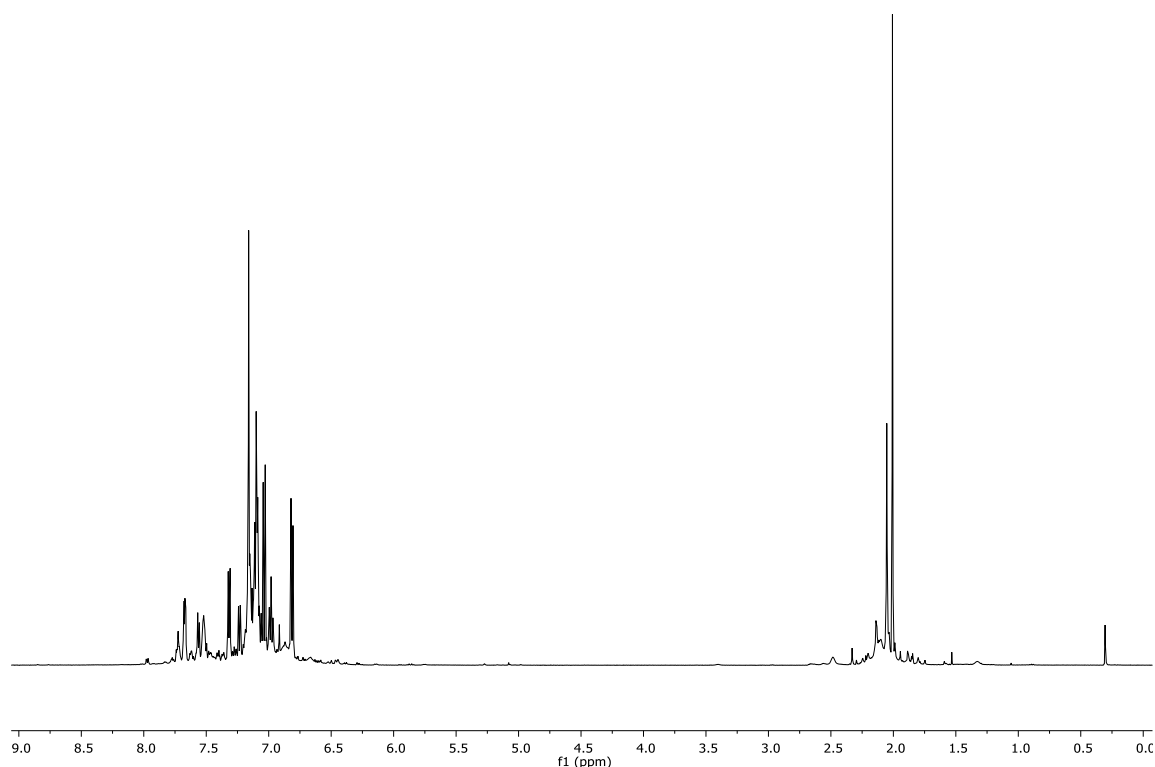

**Figure S9.** The  $^1\text{H}$  NMR spectrum (500 MHz,  $\text{C}_6\text{D}_6$ ) of the reaction with 10 mol% **1**, di-*p*-tolylcarbodiimide, and  $\text{Ph}_3\text{SnH}$  after 30 minutes.

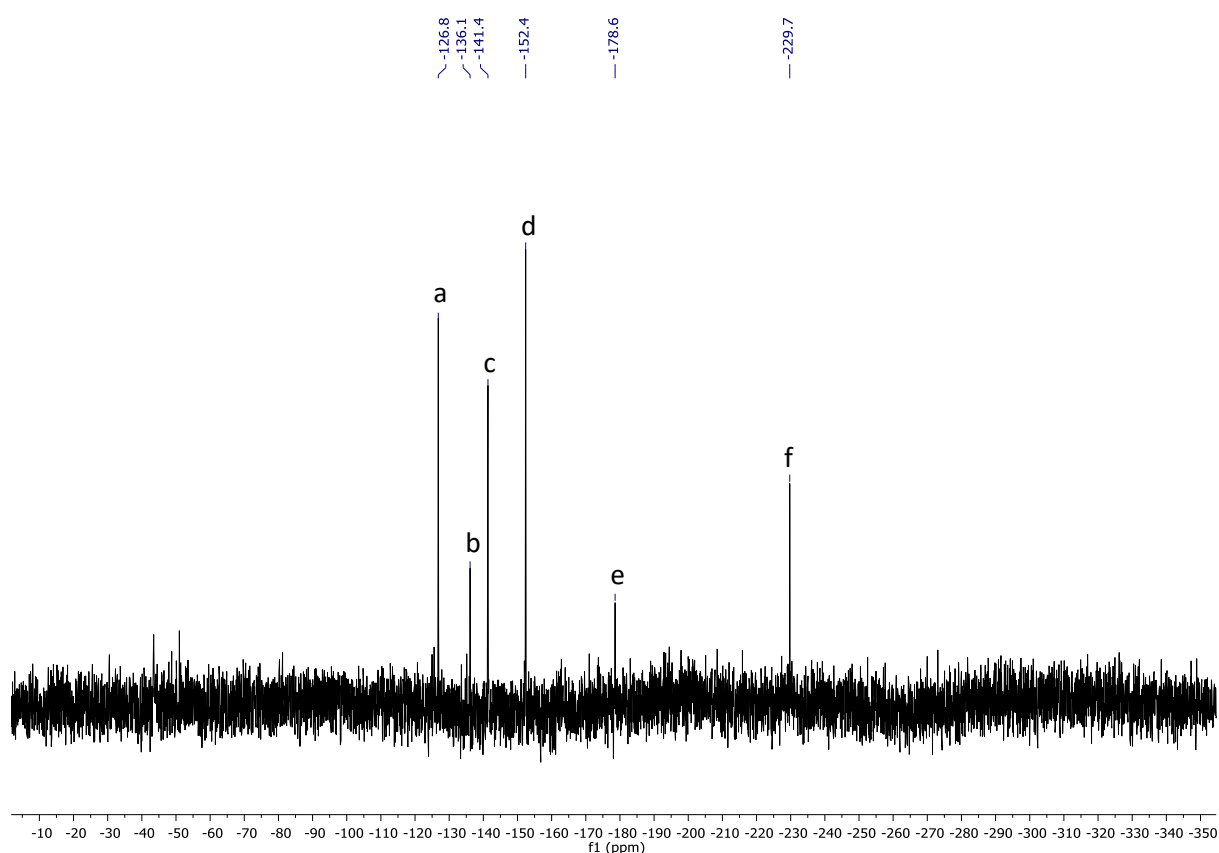

**Figure S10.** The  $^{119}\text{Sn}\{^1\text{H}\}$  NMR spectrum (186 MHz,  $\text{C}_6\text{D}_6$ ) of the reaction with 10 mol% **1**, and di-*p*-tolylcarbodiimide, and  $\text{Ph}_3\text{SnH}$  after 30 minutes. **a**,  $\text{Ph}_4\text{Sn}$ ; **b**,  $\text{Ph}_3\text{SnSn}(\text{Ph}_2)\text{SnPh}_3$ ; **c**,  $\text{Ph}_6\text{Sn}_2$ ; **d**, un-attributed; **e**, un-attributed; **f**,  $\text{Ph}_3\text{SnSn}(\text{Ph}_2)\text{SnPh}_3$ .<sup>5</sup>

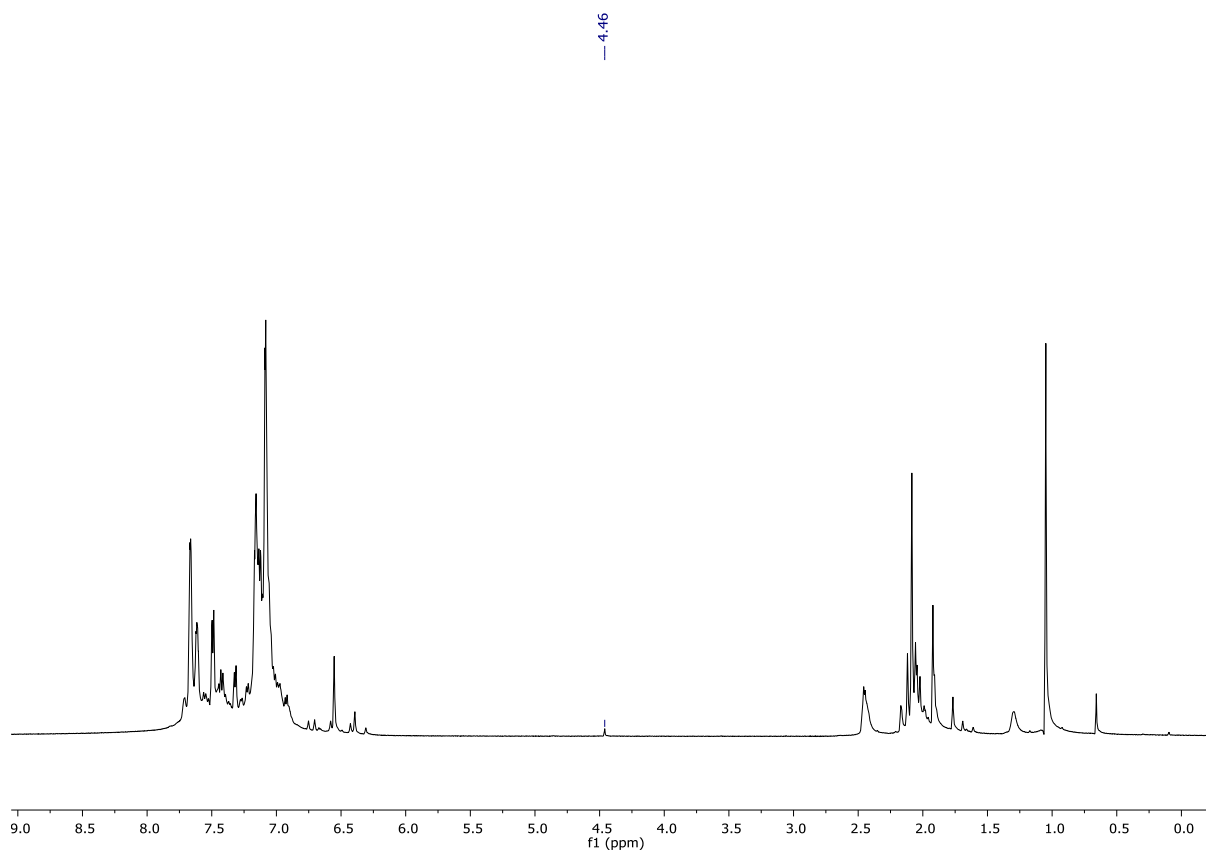

**Figure S11.** The  $^1\text{H}$  NMR spectrum (500 MHz,  $\text{C}_6\text{D}_6$ ) of the reaction between 10 mol% (6-Mes) $\text{CuOtBu}$  and  $\text{Ph}_3\text{SnH}$  after 1 hour.

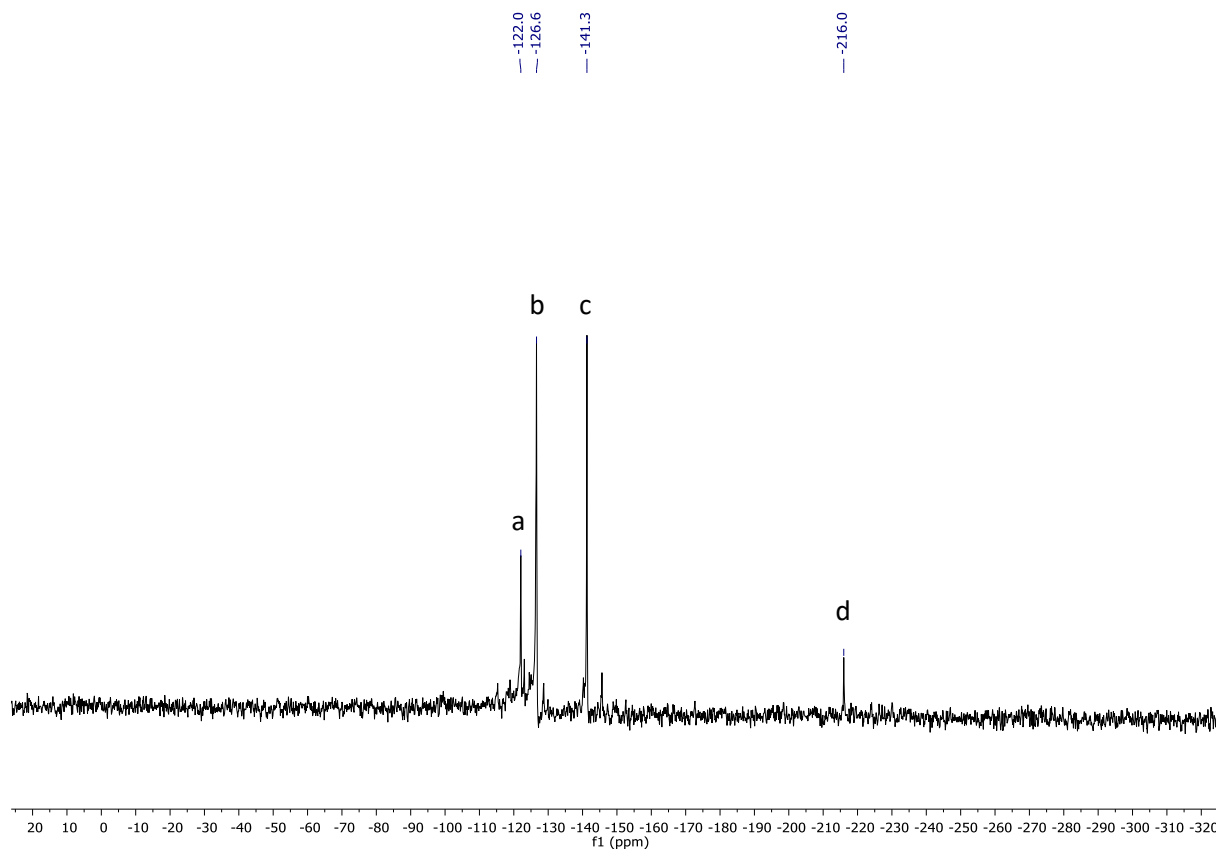

**Figure S12.** The  $^{119}\text{Sn}\{^1\text{H}\}$  NMR spectrum (186 MHz,  $\text{C}_6\text{D}_6$ ) of the reaction between 10 mol% (6-Mes) $\text{CuOtBu}$  and  $\text{Ph}_3\text{SnH}$  after 1 hour. **a**, Unattributed; **b**,  $\text{Ph}_4\text{Sn}$ ; **c**,  $\text{Ph}_6\text{Sn}_2$ ; **d**,  $(\text{Ph}_2\text{Sn})_6$ .<sup>5</sup>

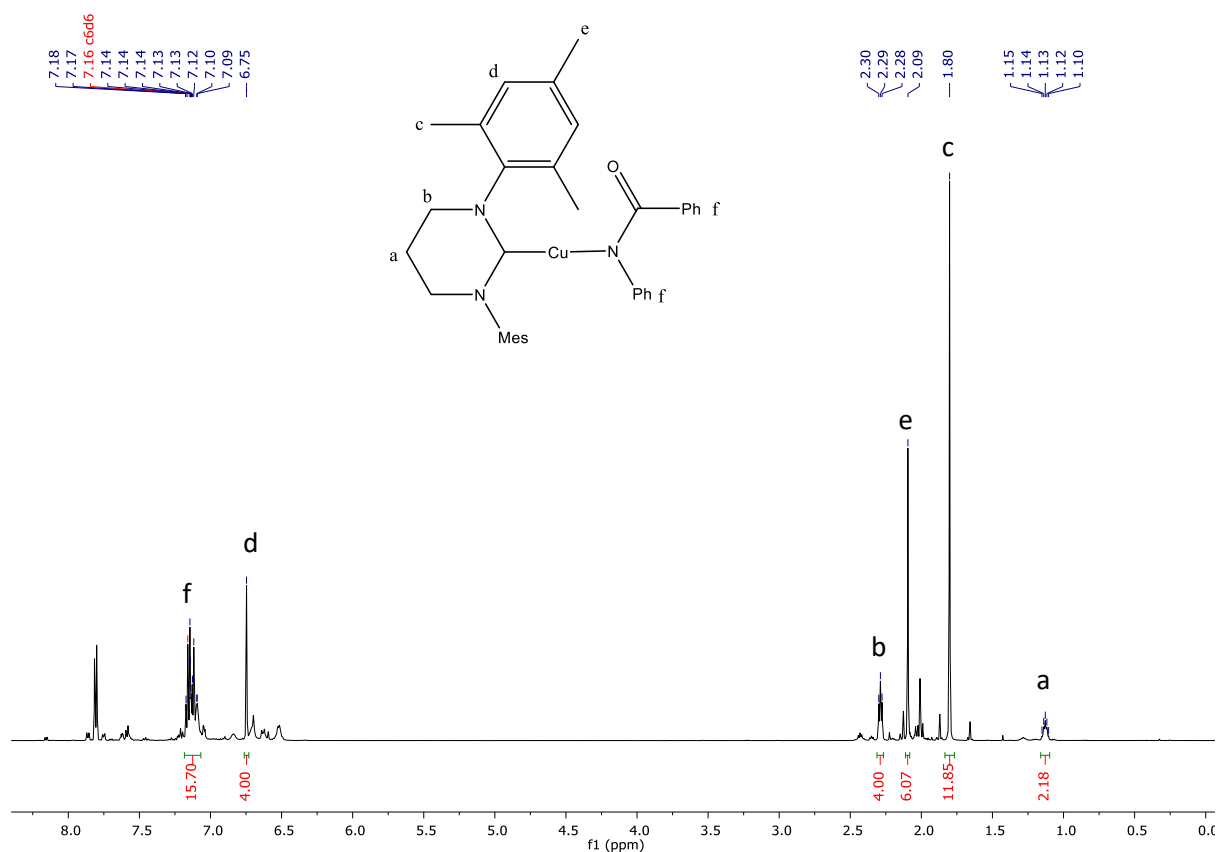

**Figure S13.** The  $^1\text{H}$  NMR spectrum (500 MHz,  $\text{C}_6\text{D}_6$ ) of the reaction between **1** and PhNCO after 30 minutes. **a**,  $\text{NCH}_2\text{CH}_2$ ; **b**,  $\text{NCH}_2$ ; **c**, *ortho*- $\text{CH}_3$ ; **d**, *meta*- $\text{CH}_3$ ; **e**, *para*- $\text{CH}_3$ ; **f**, Ar-H (solvent peak included)

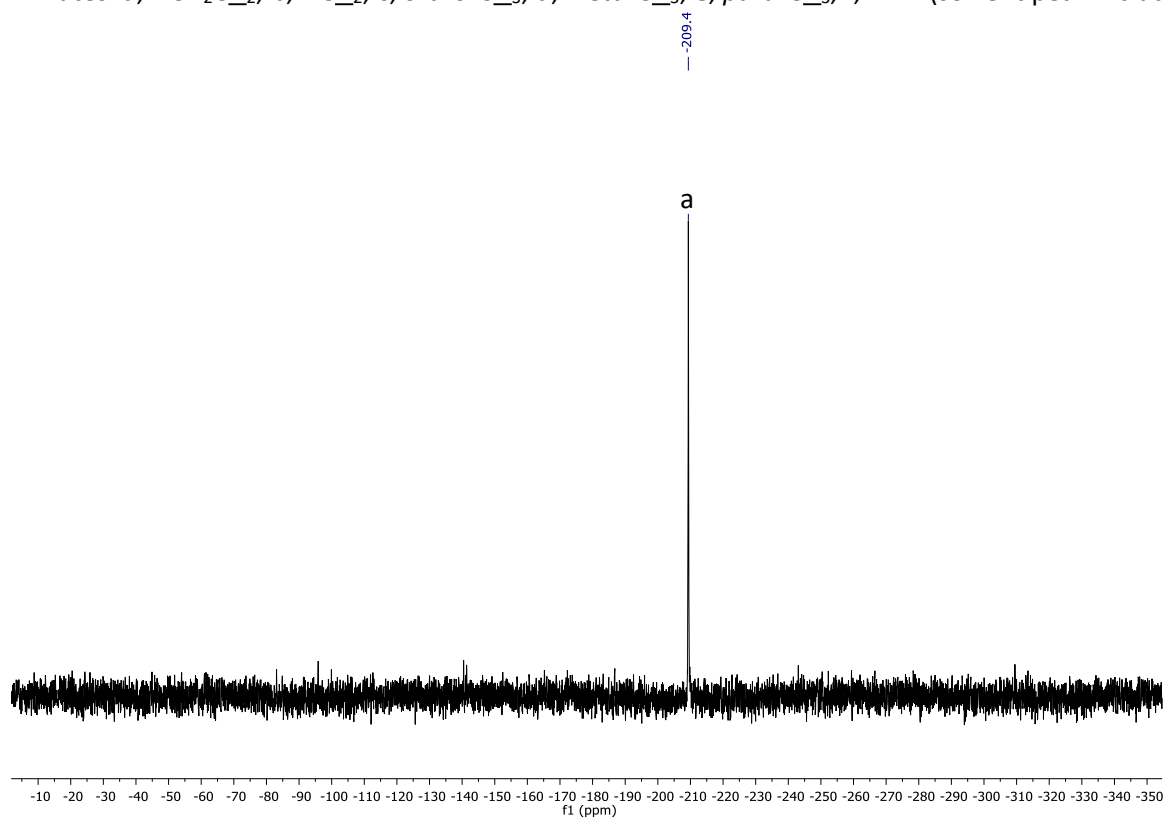

**Figure S14.** The  $^{119}\text{Sn}$  NMR spectrum (186 MHz,  $\text{C}_6\text{D}_6$ ) of the reaction between **1** and PhNCO after 30 minutes. **a**,  $(\text{Ph}_2\text{Sn})_6$ .<sup>5</sup>

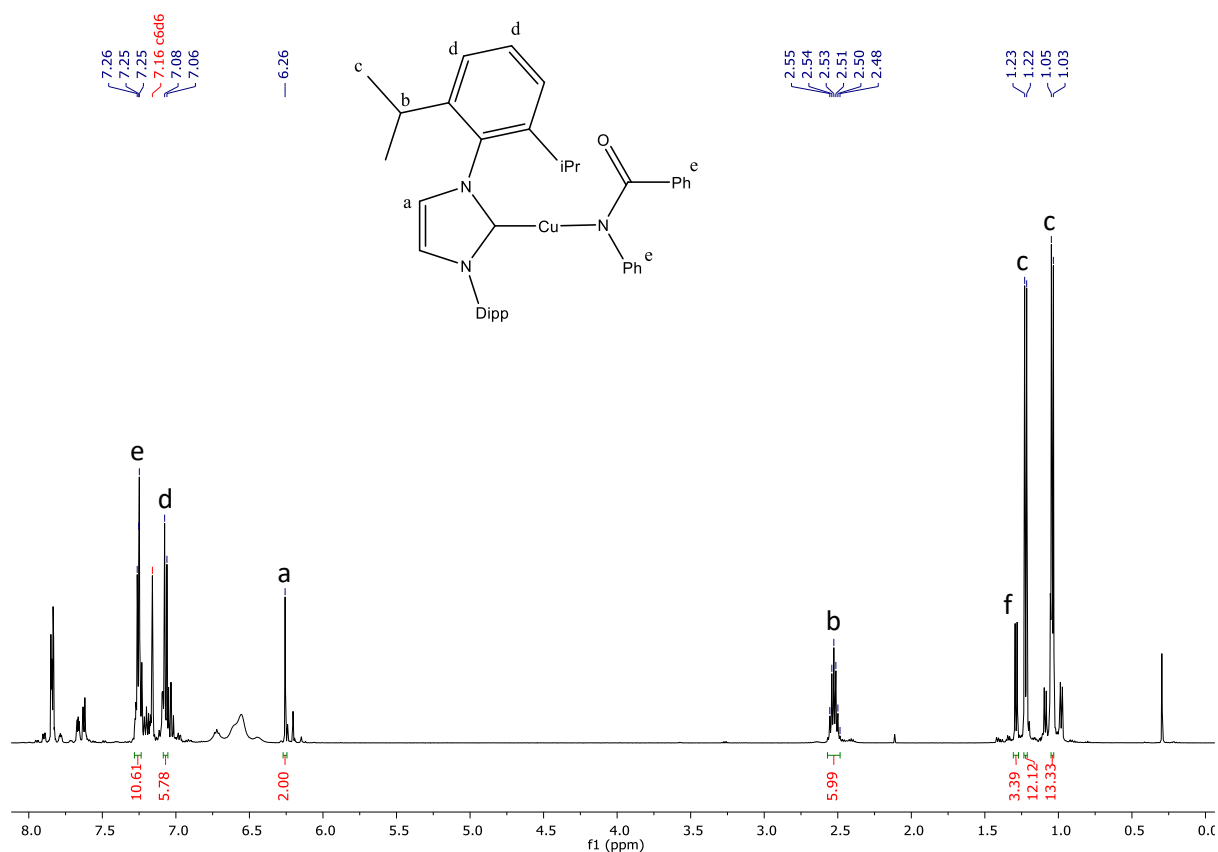

**Figure S15.** The <sup>1</sup>H NMR spectrum (500 MHz, C<sub>6</sub>D<sub>6</sub>) of the reaction between IPrCuSnPh<sub>3</sub> and PhNCO after overnight. **a**, NCH<sub>2</sub>; **b**, CH(CH<sub>3</sub>)<sub>2</sub>; **c**, CH(CH<sub>3</sub>)<sub>2</sub>; **d**, *para*-H, *meta*-H; **e**, Ar-H; **f**, ca. 28% contaminated with IPrCuSnPh<sub>3</sub>.

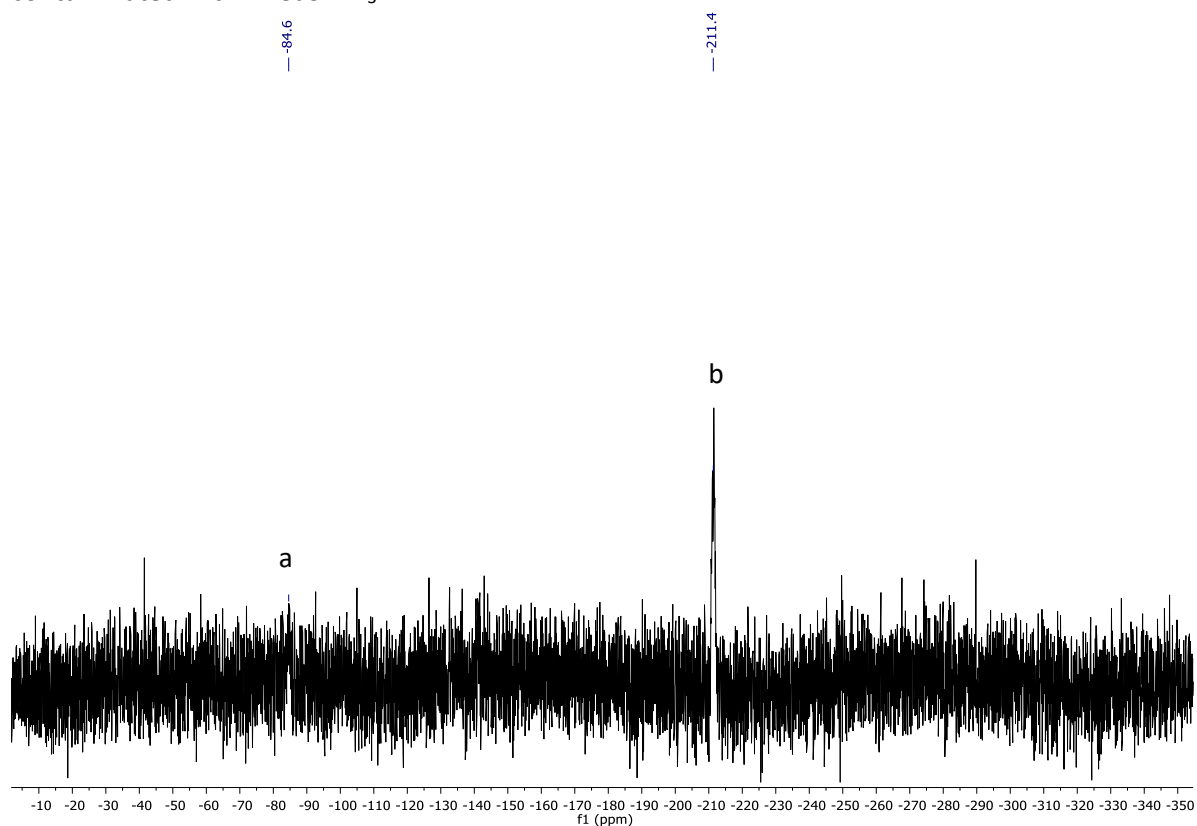

**Figure S16.** The <sup>119</sup>Sn NMR spectrum (186 MHz, C<sub>6</sub>D<sub>6</sub>) of the reaction between IPrCuSnPh<sub>3</sub> and PhNCO after overnight. **a**, IPrCuSnPh<sub>3</sub>; **b**, (Ph<sub>2</sub>Sn)<sub>6</sub>.<sup>5</sup>

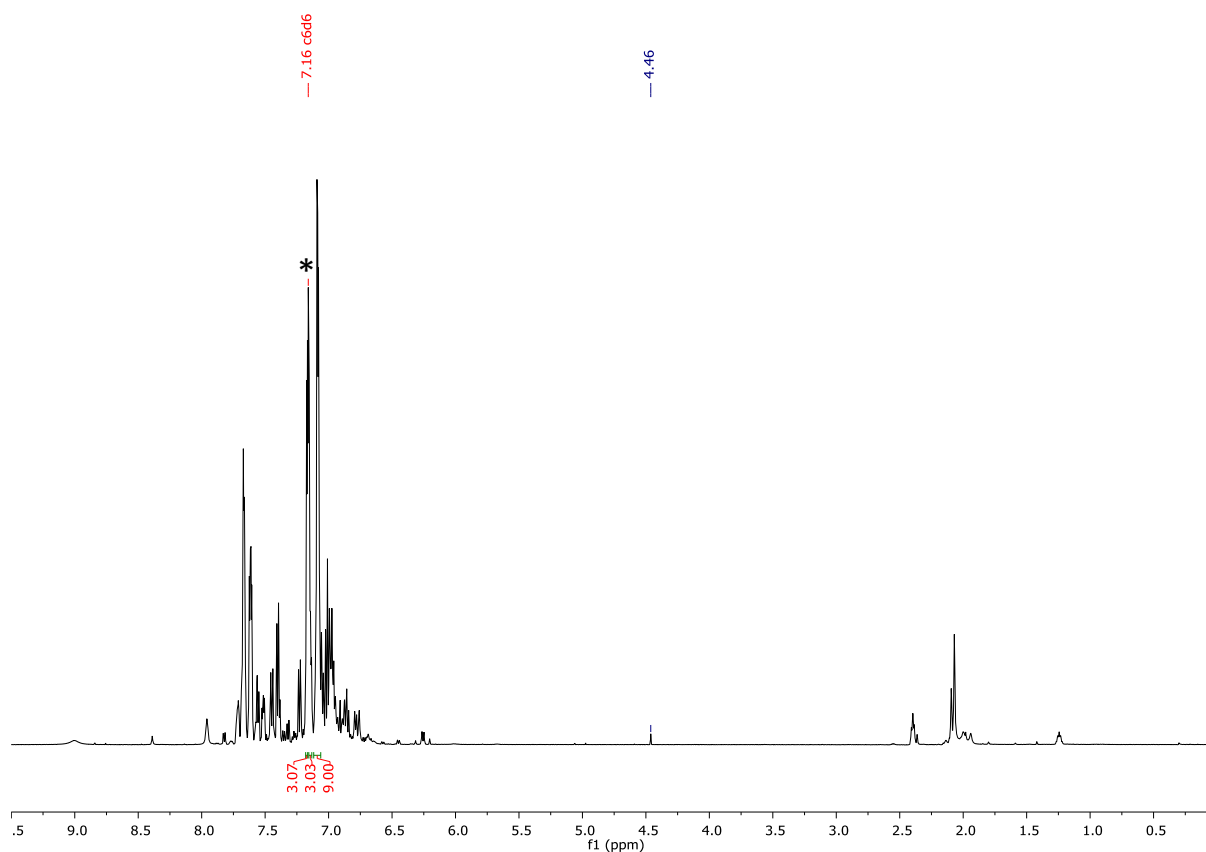

**Figure S17.** The  $^1\text{H}$  NMR spectrum (500 MHz,  $\text{C}_6\text{D}_6$ ) of the reaction between 10 mol% **1**, PhNCO, and  $\text{Ph}_3\text{SnH}$  after overnight heating at 40 °C. \* = N,N',N''-triphenylisocyanurate, Solvent overlapped.

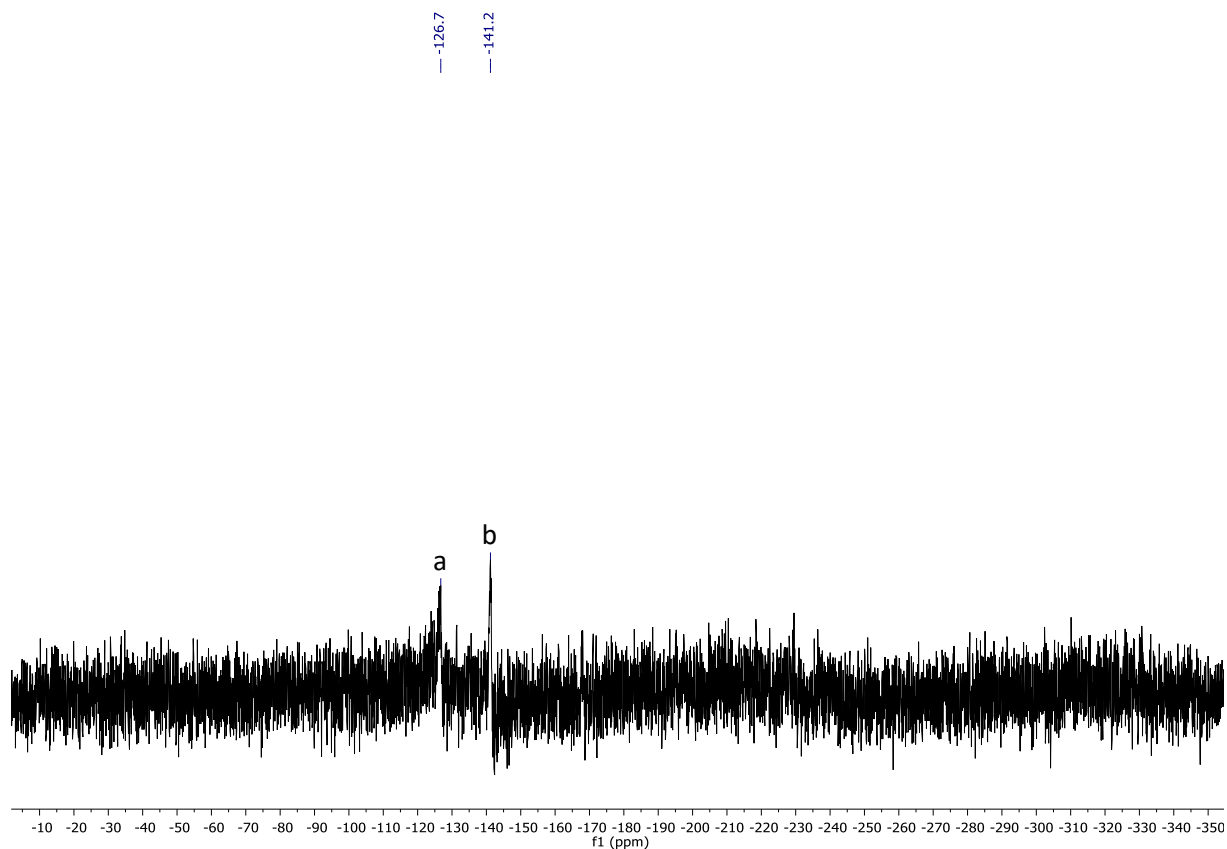

**Figure S18.** The  $^{119}\text{Sn}$  NMR spectrum (186 MHz,  $\text{C}_6\text{D}_6$ ) of the reaction between 10 mol% **1**, PhNCO, and  $\text{Ph}_3\text{SnH}$  after overnight heating at 40 °C. **a**,  $\text{Ph}_4\text{Sn}$ ; **b**,  $\text{Ph}_6\text{Sn}_2$ .<sup>5</sup>



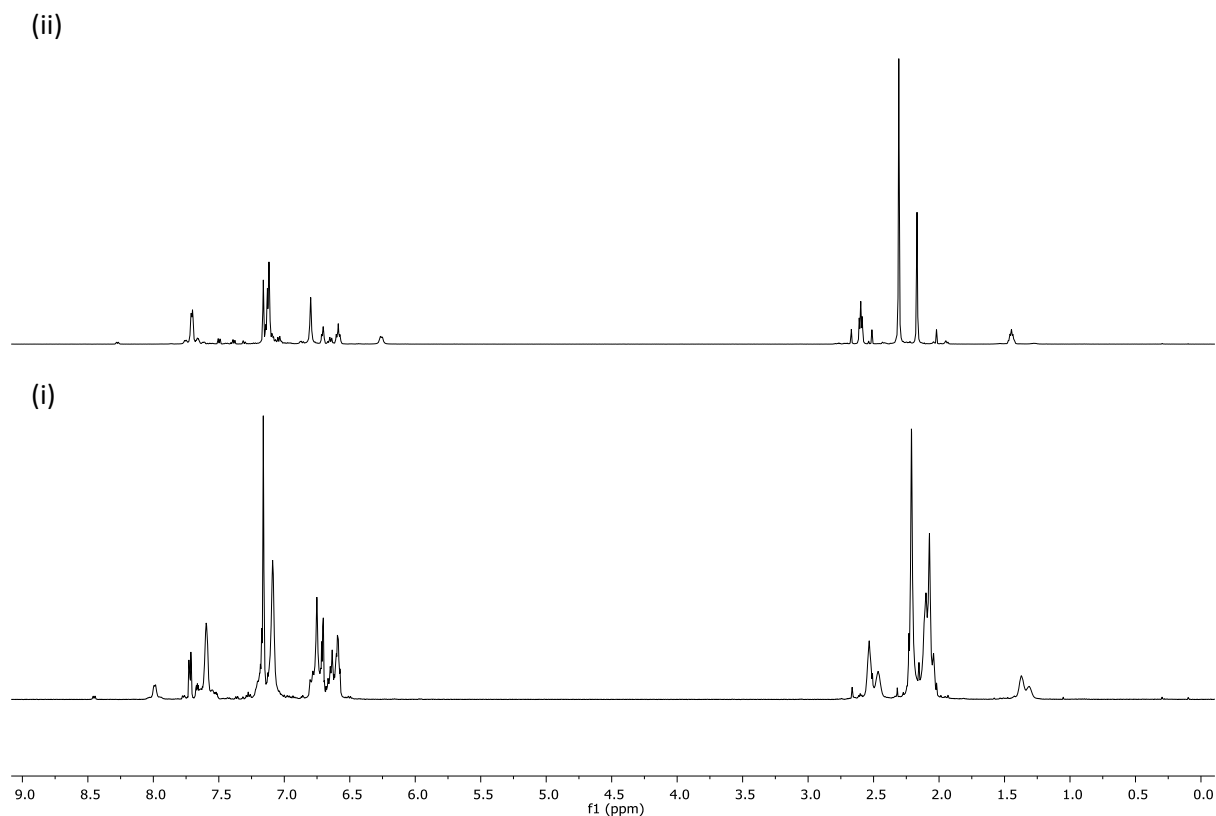

**Figure S19.** The  $^1\text{H}$  NMR spectrum (500 MHz,  $\text{C}_6\text{D}_6$ ) of the reaction between **1** and PhNCS after (i) 30 minutes and (ii) overnight.

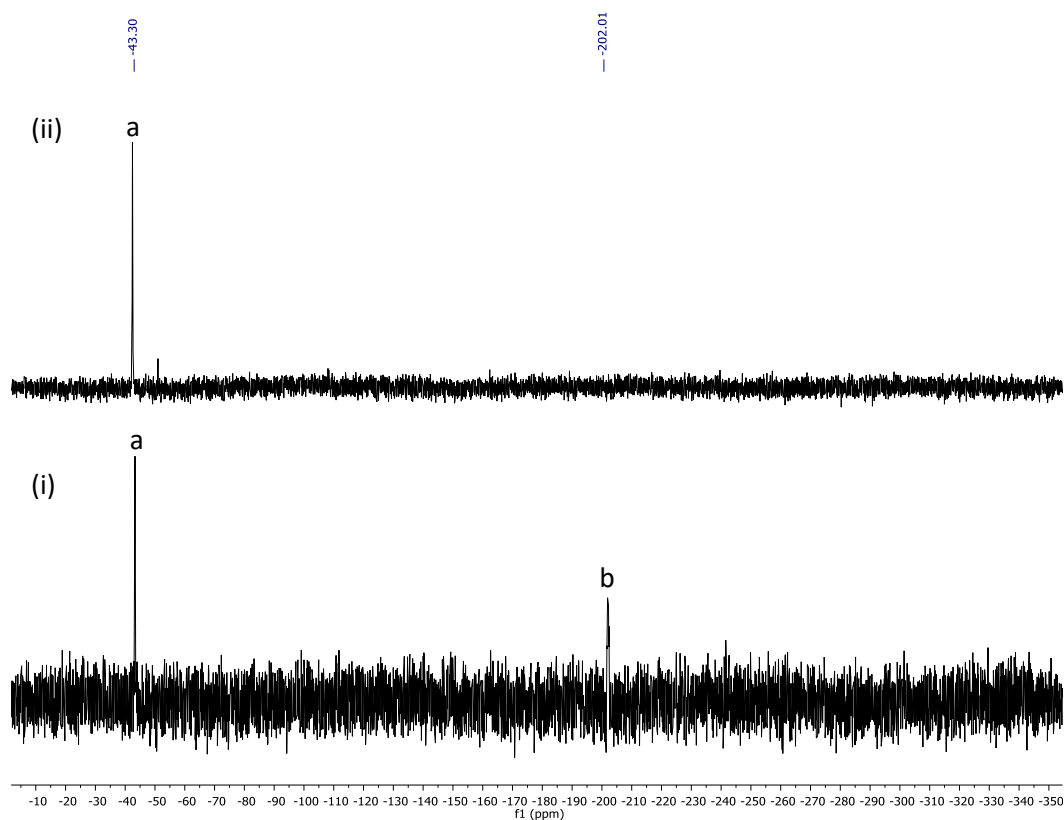

**Figure S20.** The  $^{119}\text{Sn}$  NMR spectrum (186 MHz,  $\text{C}_6\text{D}_6$ ) of the reaction between **1** and PhNCS after (i) 30 minutes and (ii) overnight. **a**,  $(\text{Ph}_2\text{Sn})_n$ ; <sup>4</sup> **b**,  $(6\text{-Mes})\text{CuN}(\text{Ph})\text{C}(\text{S})\text{SnPh}_3$ .

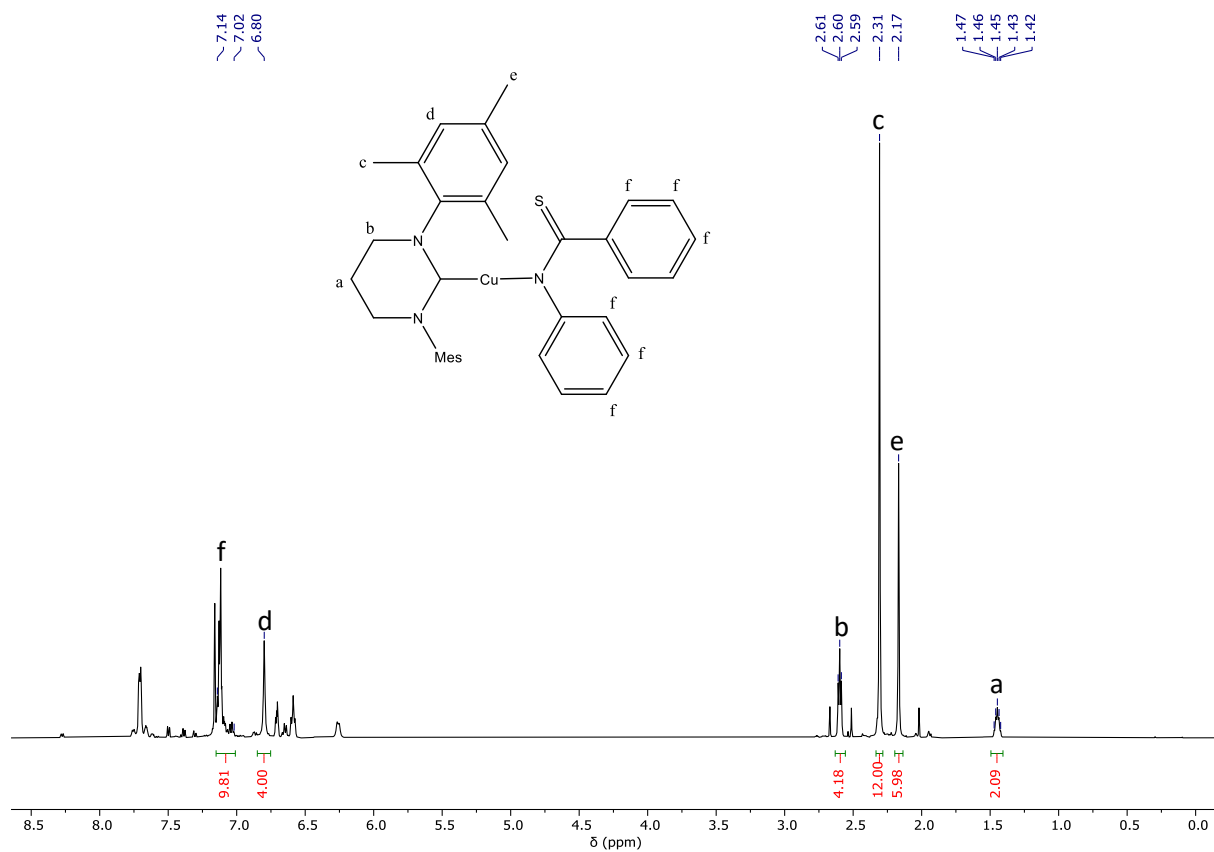

**Figure S21.** The  $^1\text{H}$  NMR spectrum (500 MHz,  $\text{C}_6\text{D}_6$ ) of the reaction between **1** and PhNCS after overnight. **a**,  $\text{NCH}_2$ ; **b**,  $\text{NCH}_2\text{CH}_2$ ; **c**, *ortho*-CH<sub>3</sub>; **d**, meta-H; **e**, *para*-CH<sub>3</sub>; **f**, Ar-H.

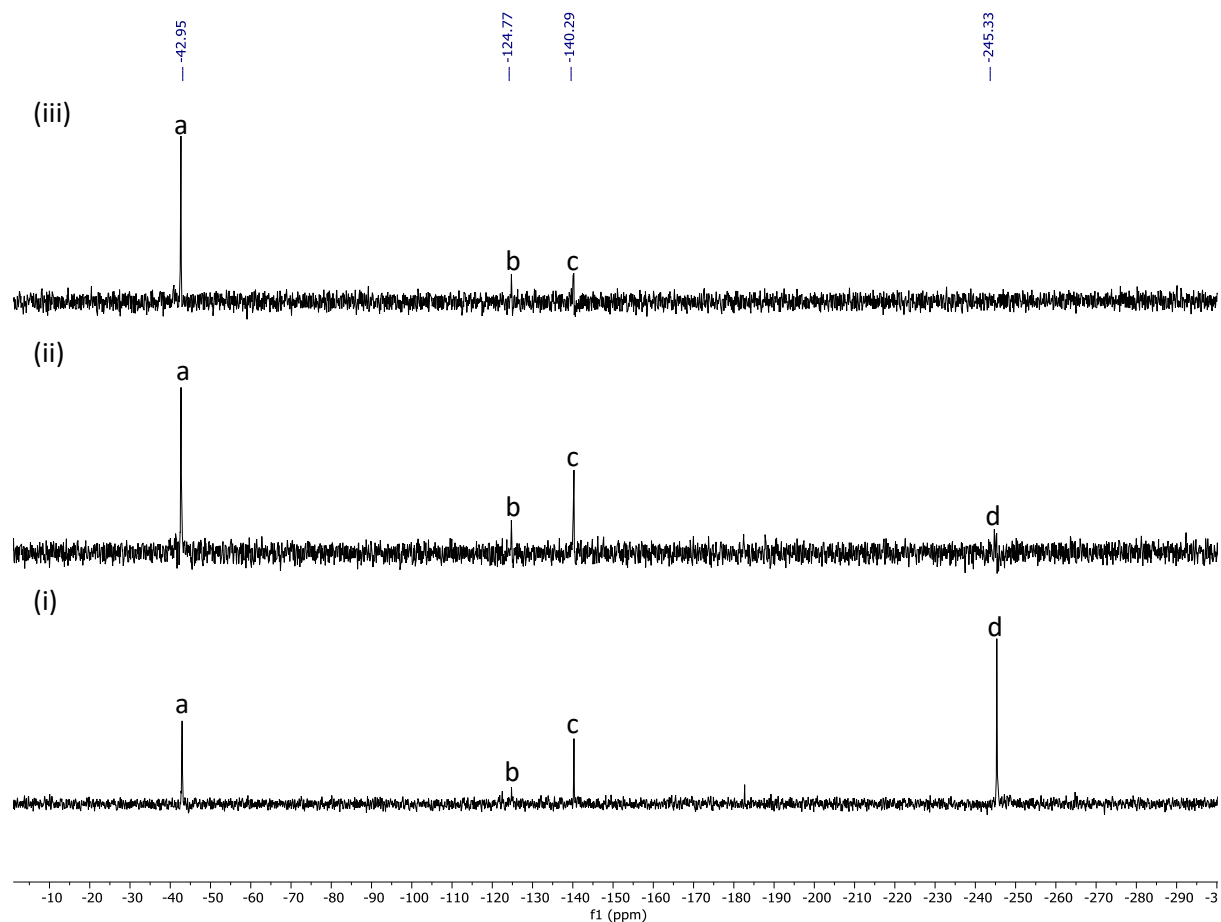

**Figure S22.** The  $^{119}\text{Sn}$  NMR spectra (186 MHz,  $d_8$ -toluene) of the reaction between **1** and di-*p*-tolylcarbodiimide at -50 °C. (i) 15 min, (ii) 30 min, and (iii) 45 minutes. **a**  $(\text{Ph}_2\text{Sn})_n$ ; **b**  $\text{SnPh}_4$ ; **c**  $\text{Sn}_2\text{Ph}_6$ ; **d**  $(6\text{-Mes})\text{CuN}(p\text{-Tol})\text{C}(=\text{N}-p\text{-Tol})\text{SnPh}_3$

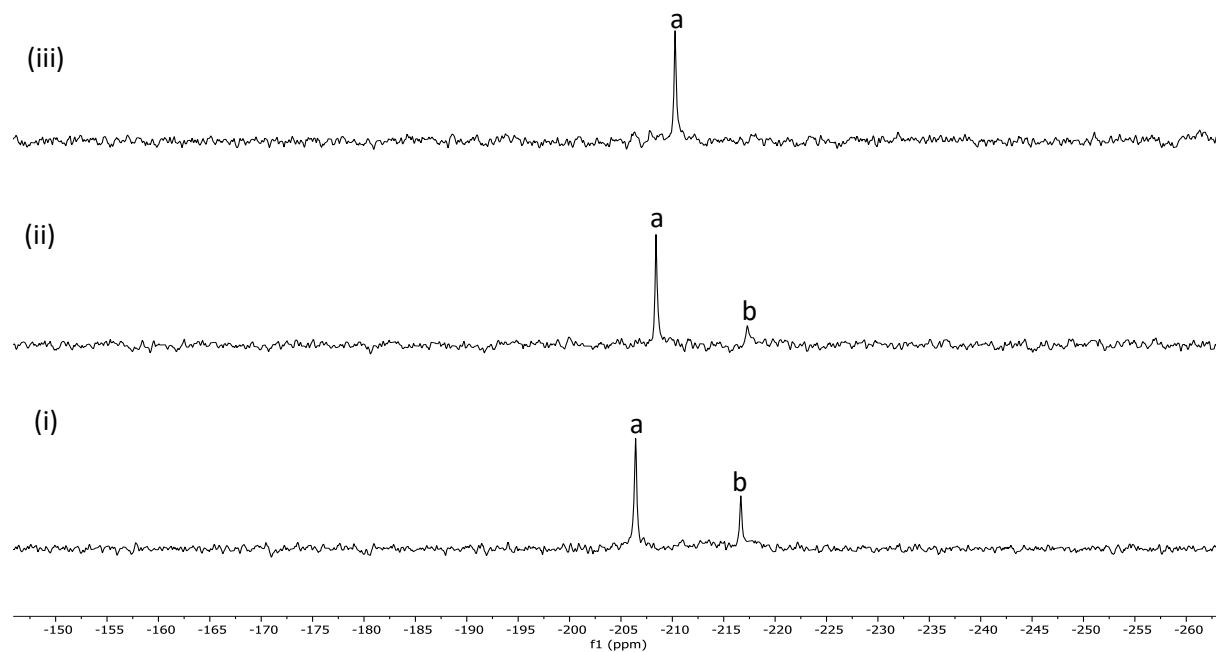

**Figure S23.** The  $^{119}\text{Sn}$  NMR spectra (186 MHz,  $d_8$ -toluene) of the reaction between **1** and  $\text{PhNCO}$  with increasing temperature (i) -50 °C, (ii) -25 °C, and (iii) 0 °C. **a**,  $(\text{Ph}_2\text{Sn})_6$ ; **b**,  $(6\text{-Mes})\text{CuN}(\text{Ph})\text{C}(=\text{O})\text{SnPh}_3$ .

## NMR spectra of Compounds 1-3

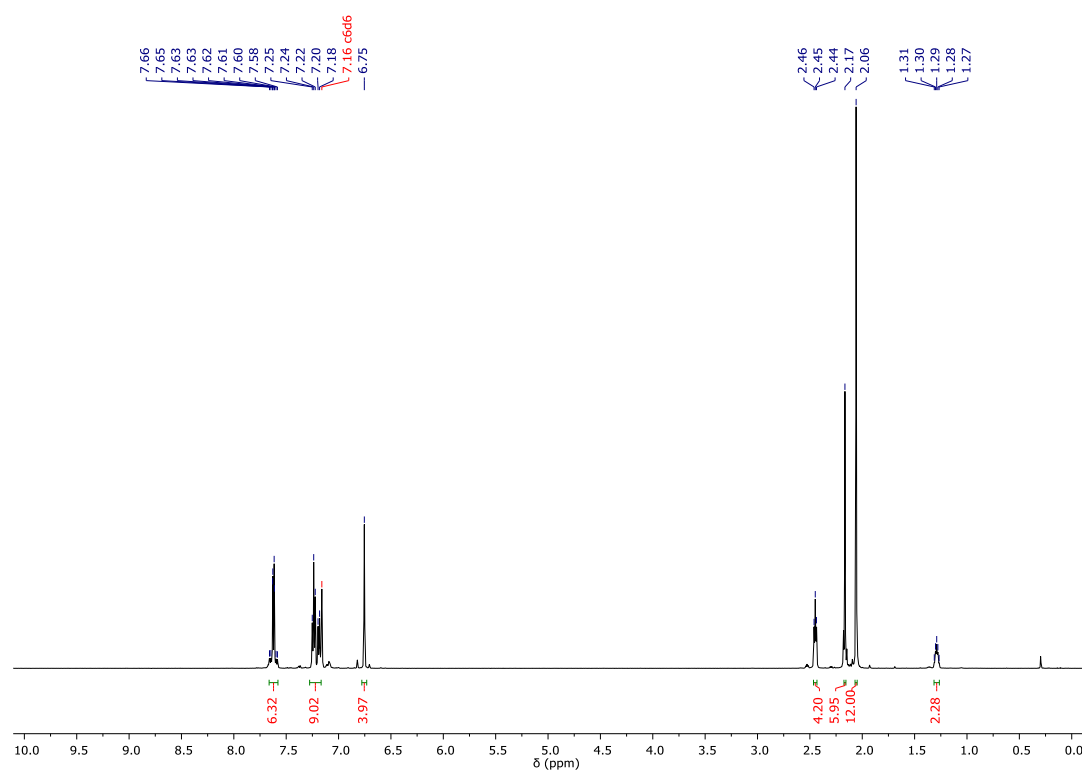

**Figure S24.** The <sup>1</sup>H NMR spectrum (500 MHz, C<sub>6</sub>D<sub>6</sub>) of compound **1**.

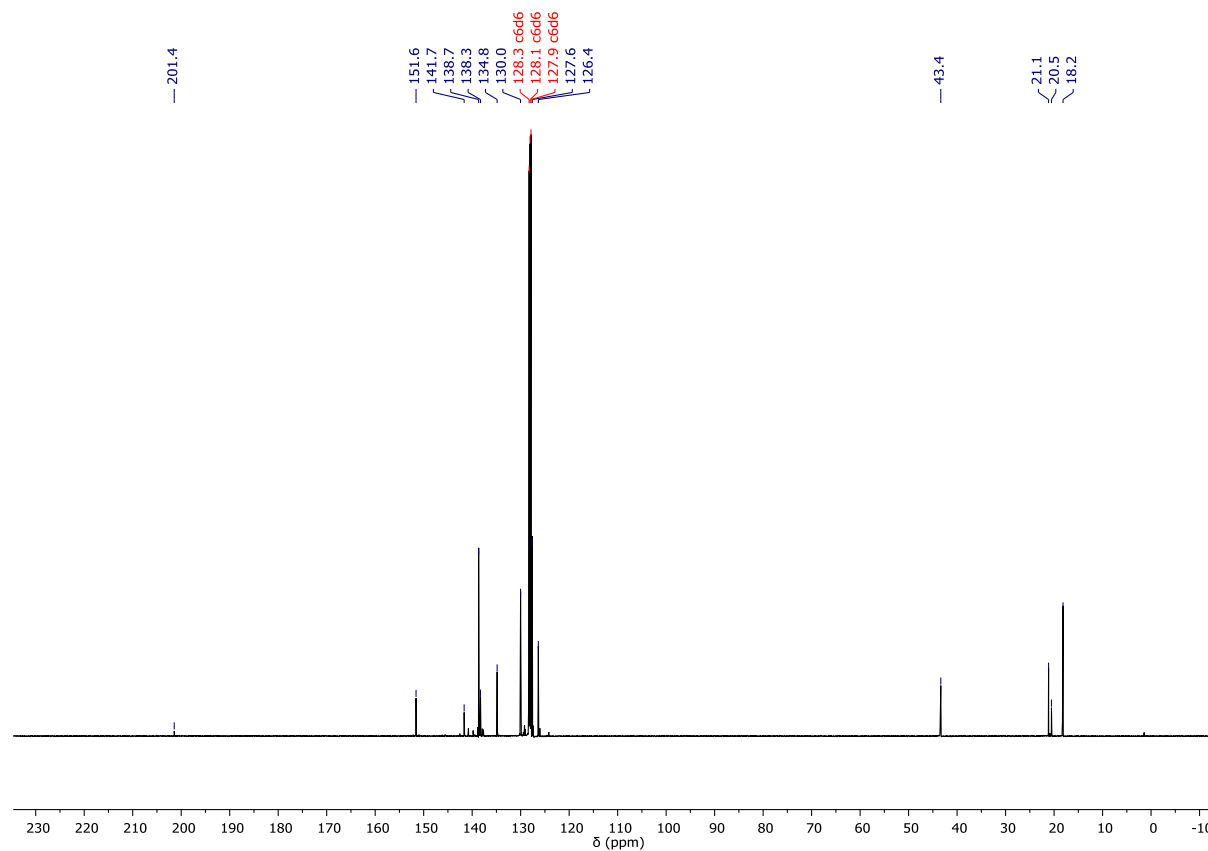

**Figure S25.** The <sup>13</sup>C{<sup>1</sup>H} NMR spectrum (126 MHz, C<sub>6</sub>D<sub>6</sub>) of compound **1**.

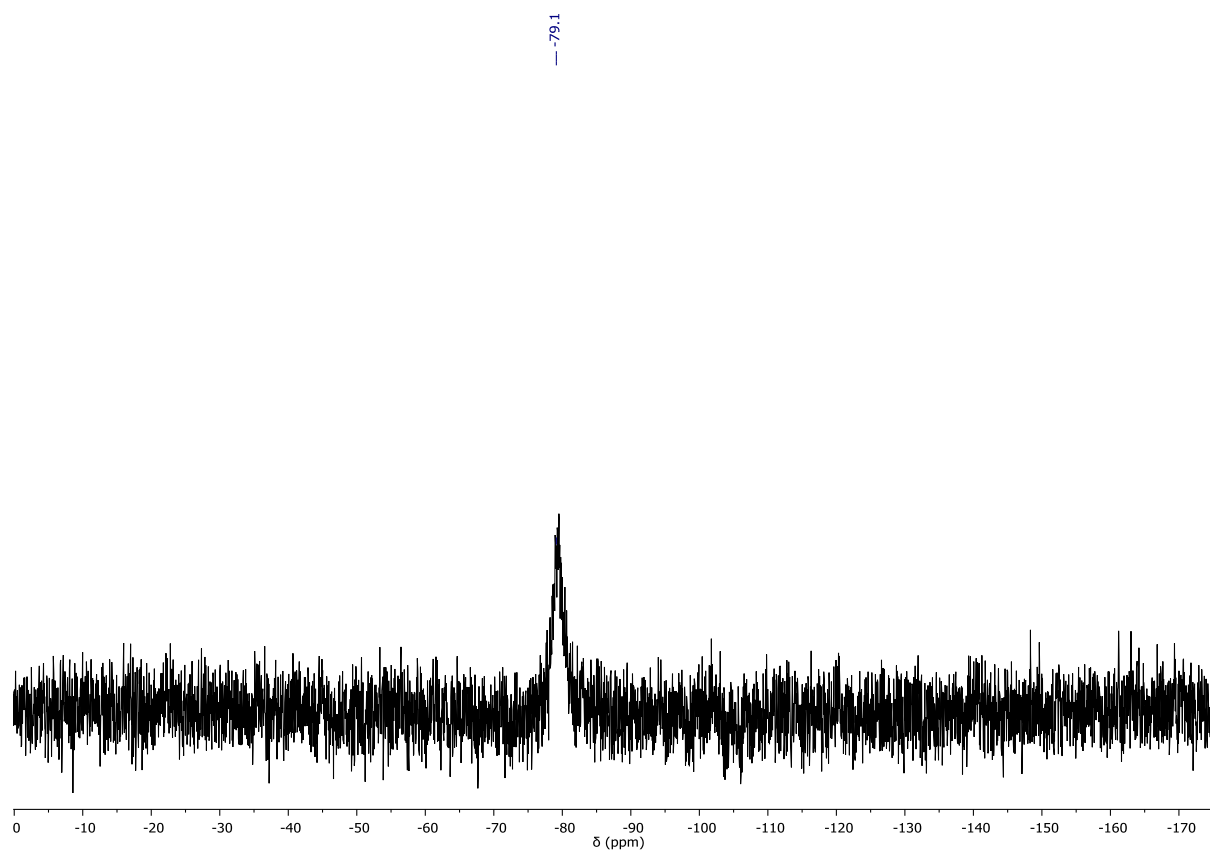

**Figure S26.** The  $^{119}\text{Sn}$  NMR spectrum (186 MHz,  $\text{C}_6\text{D}_6$ ) of compound **1**.

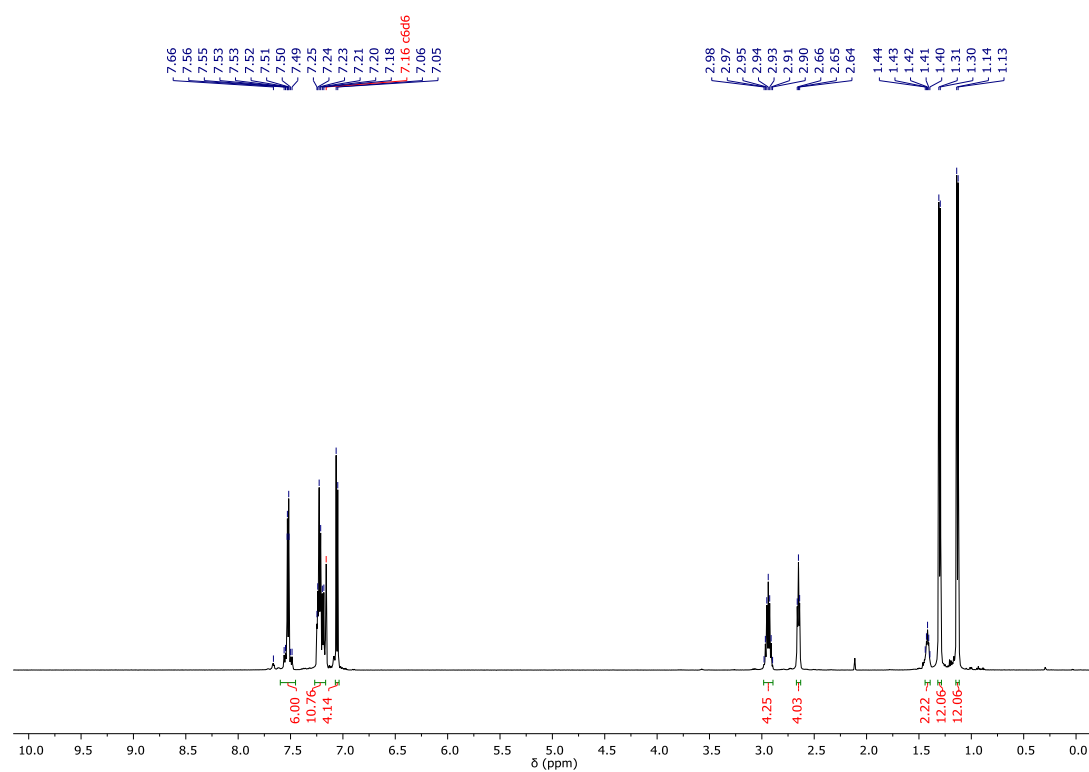

**Figure S27.** The  $^1\text{H}$  NMR spectrum (500 MHz,  $\text{C}_6\text{D}_6$ ) of compound **2**.

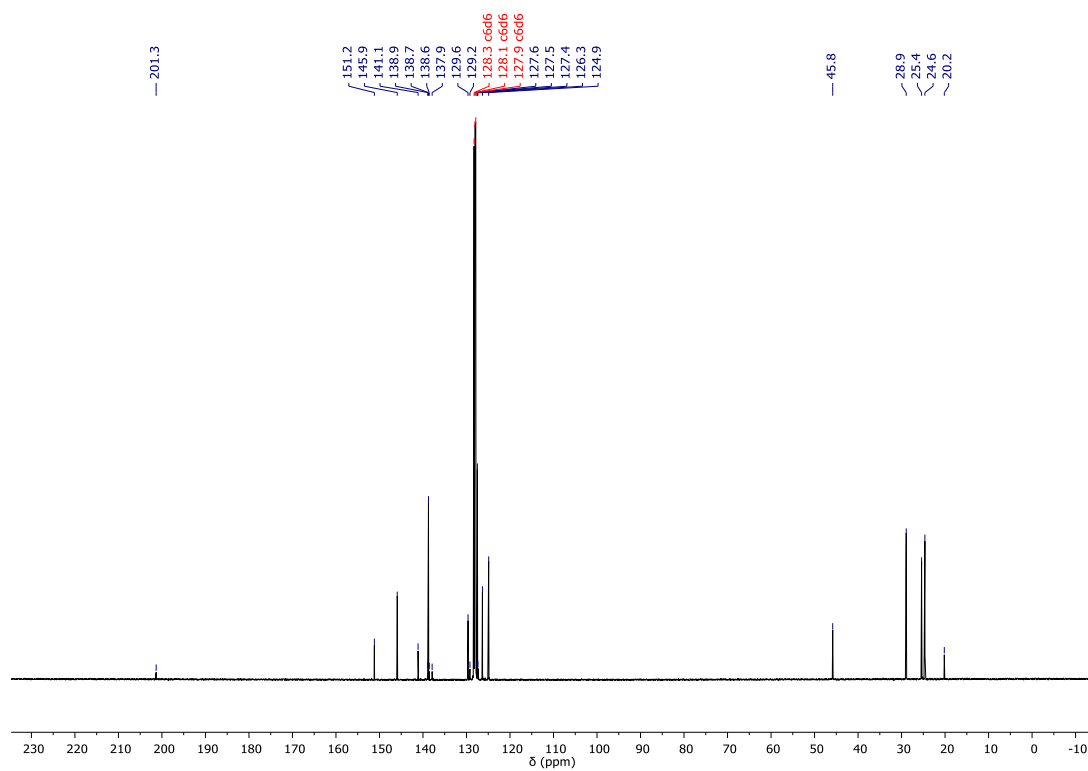

**Figure S28.** The  $^{13}\text{C}\{^1\text{H}\}$  NMR spectrum (126 MHz,  $\text{C}_6\text{D}_6$ ) of compound **2**.

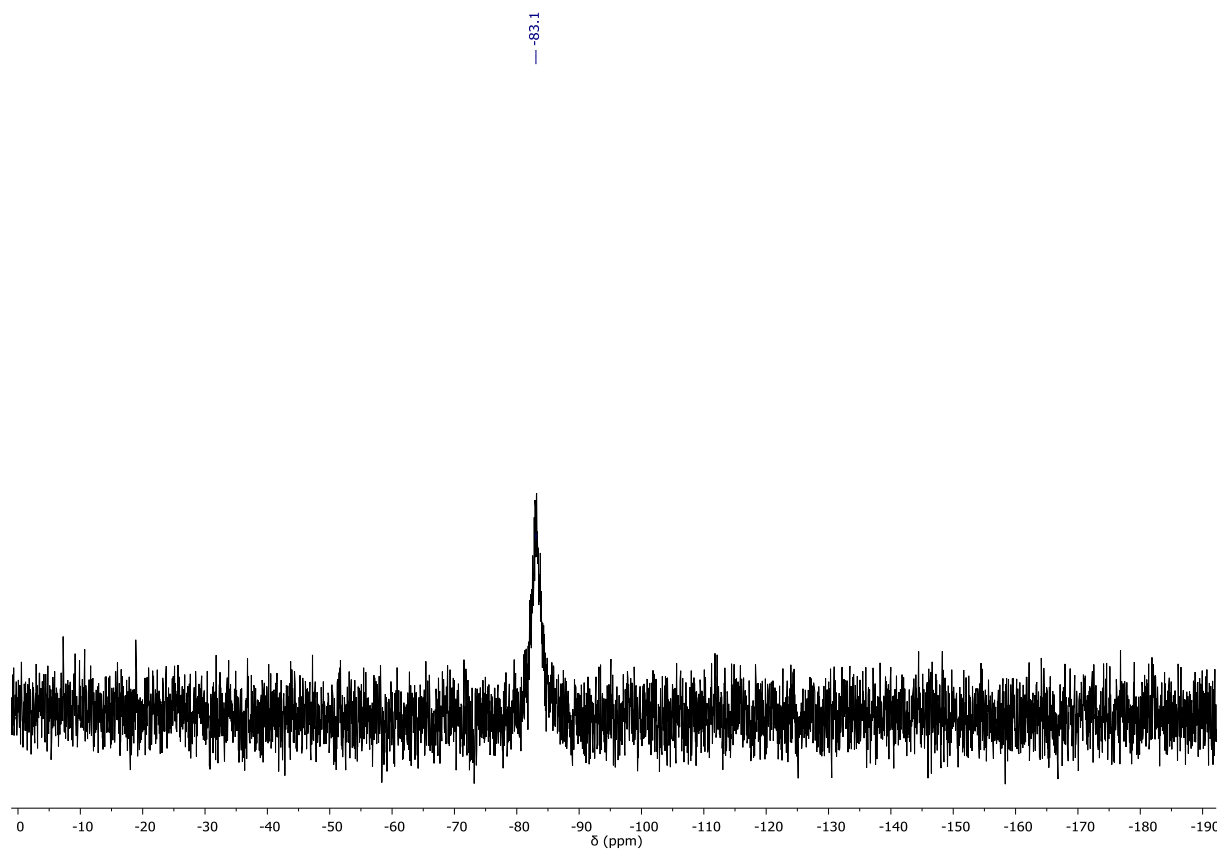

**Figure S29.** The  $^{119}\text{Sn}$  NMR spectrum (186 MHz,  $\text{C}_6\text{D}_6$ ) of compound **2**.

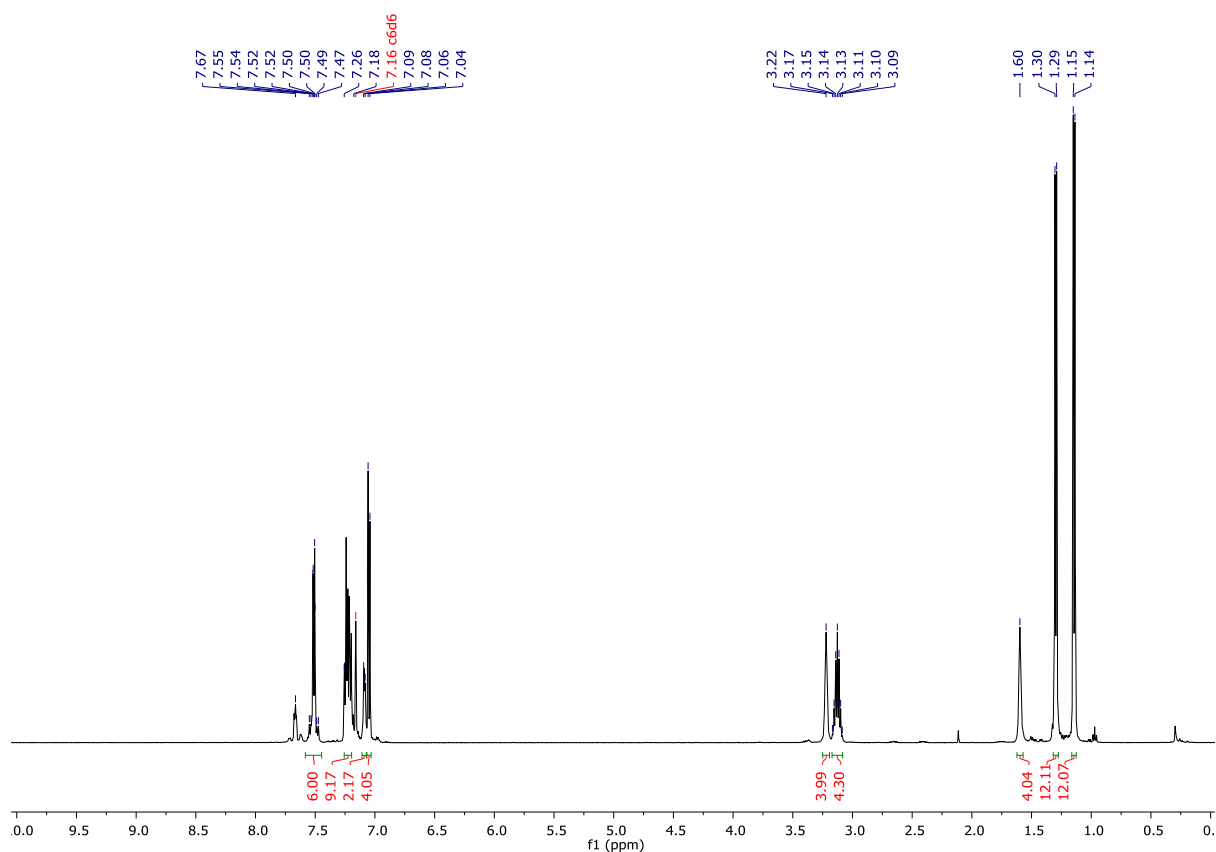

**Figure S30.** The <sup>1</sup>H NMR spectrum (500 MHz, C<sub>6</sub>D<sub>6</sub>) of compound **3**.

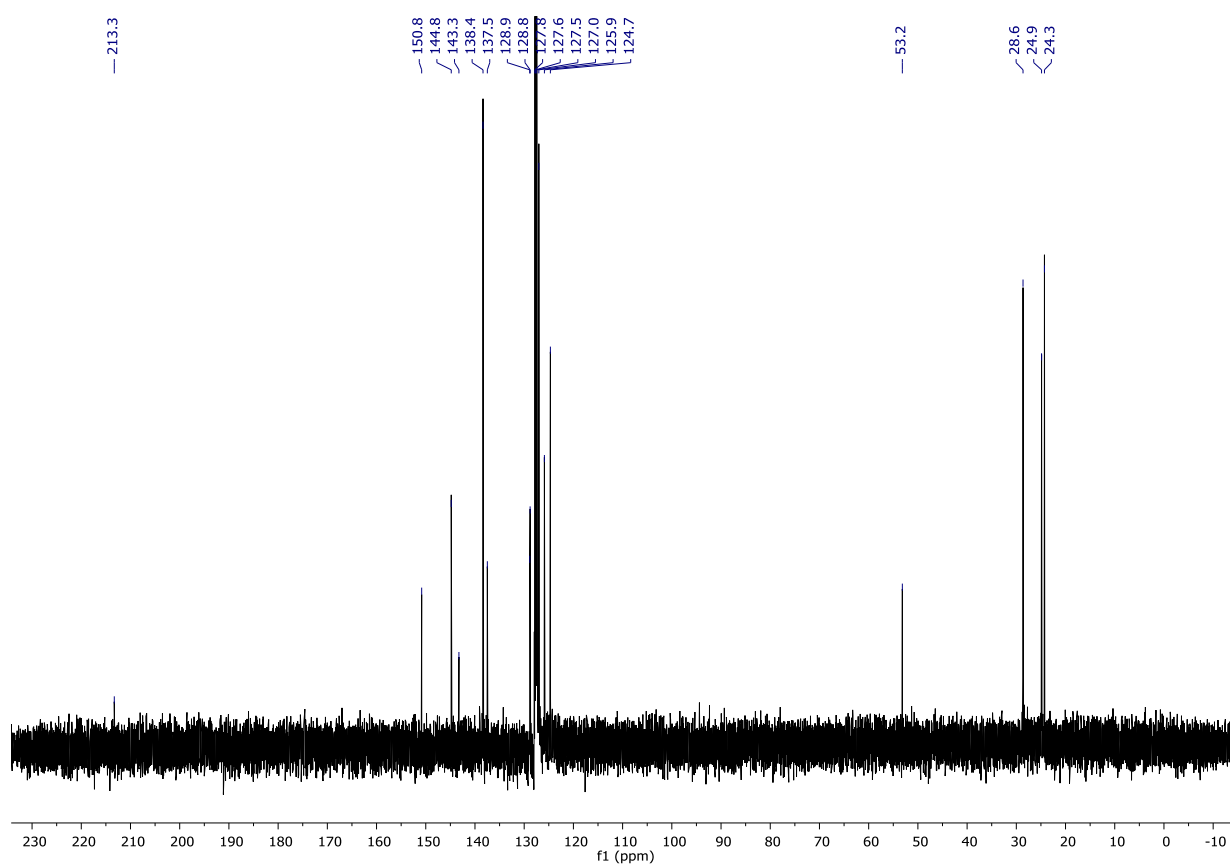

**Figure S31.** The <sup>13</sup>C{<sup>1</sup>H} NMR spectrum (126 MHz, C<sub>6</sub>D<sub>6</sub>) of compound **3**.

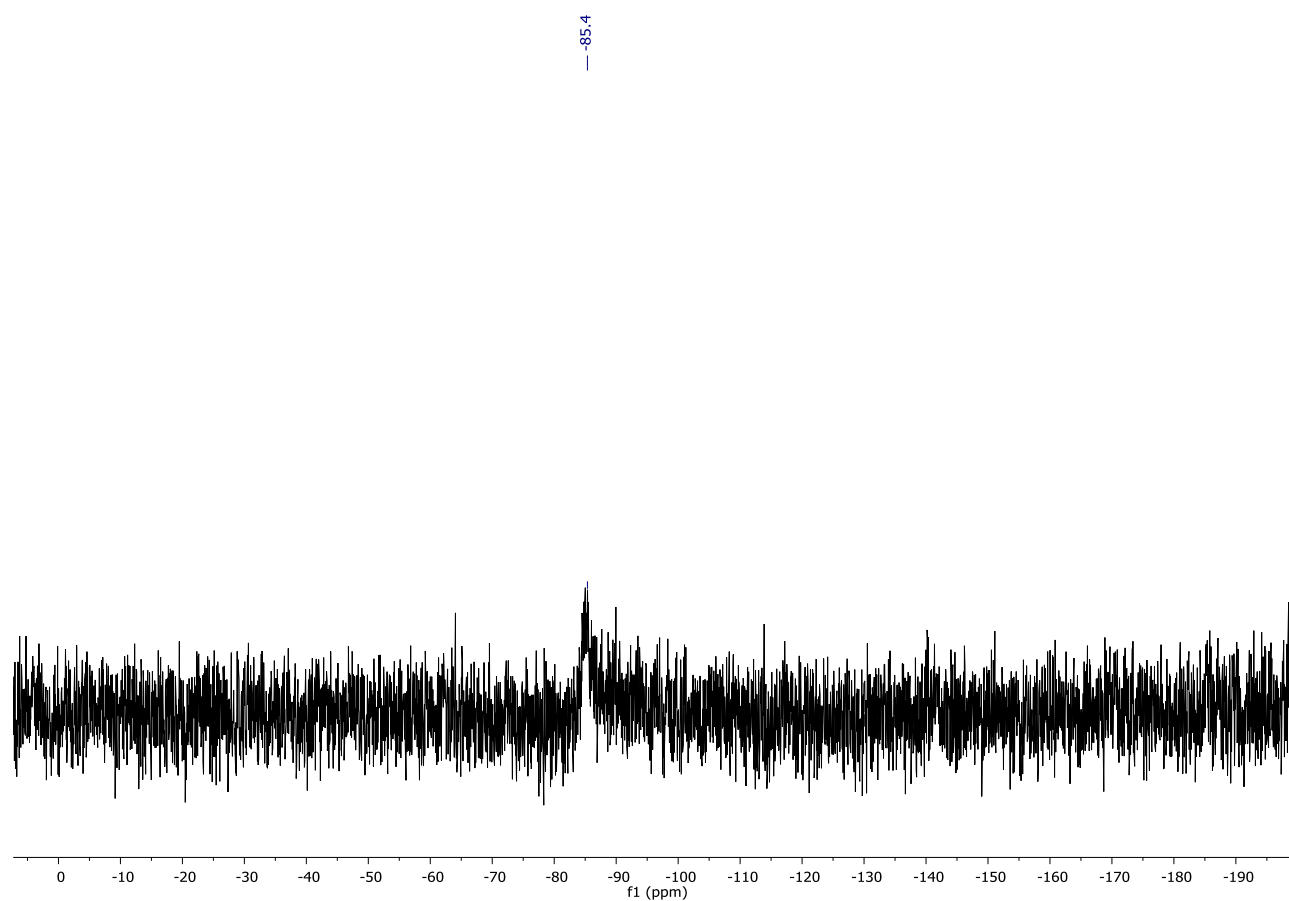

**Figure S32.** The  $^{119}\text{Sn}$  NMR spectrum (186 MHz,  $\text{C}_6\text{D}_6$ ) of compound **3**.



## Mass Spectrometry Data

## Walkup MS Report

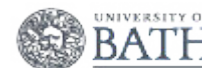

|                               |                            |                      |                       |
|-------------------------------|----------------------------|----------------------|-----------------------|
| <b>Data File</b>              | RC168_Neg_5mins_MS_21217.d | <b>Sample Name</b>   | RC168                 |
| <b>Sample Type</b>            | Sample                     | <b>Position</b>      | P1-A2                 |
| <b>Instrument Name</b>        | 6545 QToF                  | <b>User Name</b>     | Thomas Horsley Downie |
| <b>Acq Method</b>             | Neg_5mins_MS.m             | <b>Acquired Time</b> | 05/08/2021 13:34:18   |
| <b>IRM Calibration Status</b> | Success                    | <b>DA Method</b>     | Neg_5mins_MS.m        |
| <b>Comment</b>                |                            |                      |                       |

|                                  |                  |                                  |                                                          |
|----------------------------------|------------------|----------------------------------|----------------------------------------------------------|
| <b>Sample Group</b>              |                  | <b>Info.</b>                     |                                                          |
| <b>Walkup Sample Description</b> | 6MesCuSnPh3      | <b>Walkup Method</b>             | Neg_5Mins_C18                                            |
| <b>Formula</b>                   | C40 H43 Cu N2 Sn | <b>Walkup Method Description</b> | Negative mode ionization using C18 column chromatography |
| <b>Stream Name</b>               | LC 1             | <b>Acquisition SW Version</b>    | 6200 series TOF/6500 series Q-TOF B.09.00 (B9044.0)      |

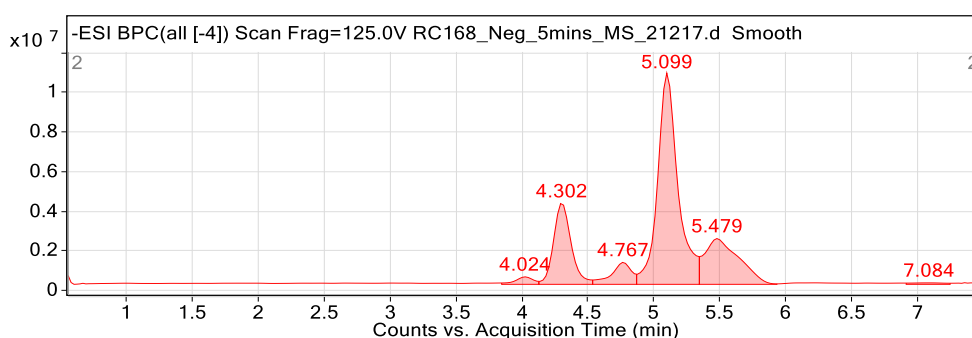

Figure 1: Base peak chromatogram

## User Chromatogram Peak List

| RT (min) | Area      | Area % | Area Sum (%) | Base Peak (m/z) | Width (min) |
|----------|-----------|--------|--------------|-----------------|-------------|
| 4.02     | 3563153   | 3.09   | 1.68         | 1033.9836       | 0.144       |
| 4.30     | 37986120  | 32.95  | 17.95        | 441.0134        | 0.141       |
| 4.77     | 11826134  | 10.26  | 5.59         | 194.0813        | 0.158       |
| 5.10     | 115292316 | 100.00 | 54.47        | 311.2025        | 0.160       |
| 5.48     | 41688935  | 36.16  | 19.69        | 473.3039        | 0.244       |
| 7.08     | 1320165   | 1.15   | 0.62         | 1033.9839       | 0.266       |

## Compound Table

| Compound Label          | RT (min) | Observed mass (m/z) | Neutral observed mass (Da) | Theoretical mass (Da) | Mass error (ppm) | Isotope match score (%) |
|-------------------------|----------|---------------------|----------------------------|-----------------------|------------------|-------------------------|
| Cpd 1: C40 H43 Cu N2 Sn | 5.57     | 729.1762            | 726.1757                   | 726.1770              | -1.86            | 64.68                   |

Mass errors of between -5.00 and 5.00 ppm with isotope match scores above 60% are considered confirmation of molecular formulae

## Walkup MS Report

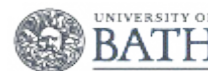

|                               |                                   |                      |                       |
|-------------------------------|-----------------------------------|----------------------|-----------------------|
| <b>Data File</b>              | 6DippCuSnPh3_Pos_5mins_MS_21855.d | <b>Sample Name</b>   | 6DippCuSnPh3          |
| <b>Sample Type</b>            | Sample                            | <b>Position</b>      | P1-A2                 |
| <b>Instrument Name</b>        | 6545 QTof                         | <b>User Name</b>     | Thomas Horsley Downie |
| <b>Acq Method</b>             | Pos_5mins_MS.m                    | <b>Acquired Time</b> | 8/26/2021 4:08:36 PM  |
| <b>IRM Calibration Status</b> | Success                           | <b>DA Method</b>     | Pos_5mins_MS.m        |
| <b>Comment</b>                |                                   |                      |                       |

|                                  |              |                                  |                                                          |
|----------------------------------|--------------|----------------------------------|----------------------------------------------------------|
| <b>Sample Group</b>              |              | <b>Info.</b>                     |                                                          |
| <b>Walkup Sample Description</b> |              | <b>Walkup Method</b>             | Pos_5Mins_C18                                            |
| <b>Formula</b>                   | C46H55CuN2Sn | <b>Walkup Method Description</b> | Positive mode ionization using C18 column chromatography |
| <b>Stream Name</b>               | LC 1         | <b>Acquisition SW Version</b>    | 6200 series TOF/6500 series Q-TOF B.09.00 (B9044.0)      |

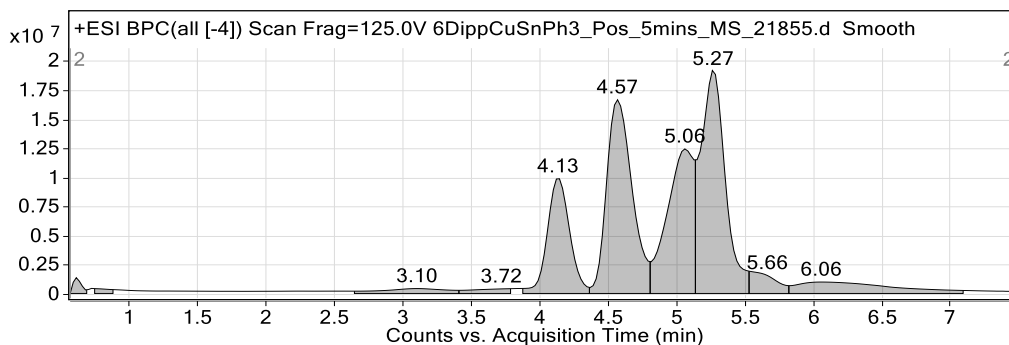

Figure 1: Base peak chromatogram

## User Chromatogram Peak List

| RT (min) | Area      | Area % | Area Sum (%) | Base Peak (m/z) | Width (min) |
|----------|-----------|--------|--------------|-----------------|-------------|
| 0.62     | 5701828   | 2.39   | 0.68         | 194.1178        | 0.070       |
| 0.79     | 3012643   | 1.26   | 0.36         | 116.1071        | 0.110       |
| 3.10     | 14039235  | 5.89   | 1.68         | 194.1179        | 0.460       |
| 3.72     | 7710998   | 3.24   | 0.92         | 116.9862        | 0.300       |
| 4.13     | 112960084 | 47.40  | 13.48        | 351.0206        | 0.170       |
| 4.57     | 216912726 | 91.02  | 25.89        | 508.2771        | 0.200       |
| 5.06     | 166618557 | 69.91  | 19.88        | 421.3240        | 0.200       |
| 5.27     | 238325279 | 100.00 | 28.44        | 421.3292        | 0.180       |
| 5.66     | 23808792  | 9.99   | 2.84         | 325.2936        | 0.250       |
| 6.06     | 48891187  | 20.51  | 5.83         | 116.9864        | 0.730       |

## Compound Table

| Compound Label          | RT (min) | Observed mass (m/z) | Neutral observed mass (Da) | Theoretical mass (Da) | Mass error (ppm) | Isotope match score (%) |
|-------------------------|----------|---------------------|----------------------------|-----------------------|------------------|-------------------------|
| Cpd 1: C46 H55 Cu N2 Sn | 4.77     | 819.2915            | 810.2683                   | 810.2709              | -3.28            | 63.40                   |

Mass errors of between -5.00 and 5.00 ppm with isotope match scores above 60% are considered confirmation of molecular formulae

## Walkup MS Report

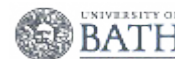

|                               |                                                    |                      |                                 |
|-------------------------------|----------------------------------------------------|----------------------|---------------------------------|
| <b>Data File</b>              | 7DippCuSnph3_Neg_LoopInjection_MS_unbiased_21748.d | <b>Sample Name</b>   | 7DippCuSnph3                    |
| <b>Sample Type</b>            | Sample                                             | <b>Position</b>      | P1-A3                           |
| <b>Instrument Name</b>        | 6545 QTof                                          | <b>User Name</b>     | Thomas Horsley Downie           |
| <b>Acq Method</b>             | Neg_LoopInjection_MS_unbiased.m                    | <b>Acquired Time</b> | 23/08/2021 17:33:55             |
| <b>IRM Calibration Status</b> | Success                                            | <b>DA Method</b>     | Neg_LoopInjection_MS_unbiased.m |
| <b>Comment</b>                |                                                    |                      |                                 |

|                                  |              |                                  |                                                          |
|----------------------------------|--------------|----------------------------------|----------------------------------------------------------|
| <b>Sample Group</b>              | 7DippCuSnPh3 | <b>Info.</b>                     |                                                          |
| <b>Walkup Sample Description</b> |              | <b>Walkup Method</b>             | Neg_LoopInjection_unbiased                               |
| <b>Formula</b>                   | C47H57CuN2Sn | <b>Walkup Method Description</b> | Negative mode loop injection with unbiased isotope model |

|                    |      |                               |                                                     |
|--------------------|------|-------------------------------|-----------------------------------------------------|
| <b>Stream Name</b> | LC 1 | <b>Acquisition SW Version</b> | 6200 series TOF/6500 series Q-TOF B.09.00 (B9044.0) |
|--------------------|------|-------------------------------|-----------------------------------------------------|

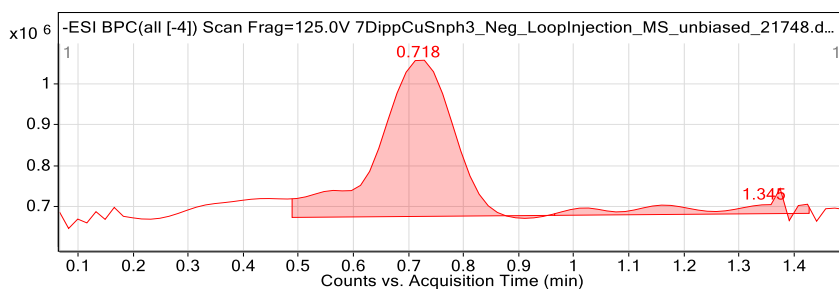

Figure 1: Base peak chromatogram

## User Chromatogram Peak List

| RT (min) | Area    | Area % | Area Sum (%) | Base Peak (m/z) | Width (min) |
|----------|---------|--------|--------------|-----------------|-------------|
| 0.72     | 3604628 | 100.00 | 89.63        | 1033.9782       | 0.182       |
| 1.35     | 416930  | 11.57  | 10.37        | 1033.9782       | 0.222       |

## Compound Table

| Compound Label          | RT (min) | Observed mass (m/z) | Neutral observed mass (Da) | Theoretical mass (Da) | Mass error (ppm) | Isotope match score (%) |
|-------------------------|----------|---------------------|----------------------------|-----------------------|------------------|-------------------------|
| Cpd 1: C47 H57 Cu N2 Sn | 0.69     | 877.2804            | 824.2842                   | 824.2866              | -2.90            | 91.25                   |

Mass errors of between -5.00 and 5.00 ppm with isotope match scores above 60% are considered confirmation of molecular formulae

## Walkup MS Report



|                               |                            |                      |                     |
|-------------------------------|----------------------------|----------------------|---------------------|
| <b>Data File</b>              | RC283_Pos_5mins_MS_24218.d | <b>Sample Name</b>   | RC283               |
| <b>Sample Type</b>            | Sample                     | <b>Position</b>      | P1-A1               |
| <b>Instrument Name</b>        | 6545 QTof                  | <b>User Name</b>     | Rex Charman         |
| <b>Acq Method</b>             | Pos_5mins_MS.m             | <b>Acquired Time</b> | 06/12/2021 10:44:02 |
| <b>IRM Calibration Status</b> | Success                    | <b>DA Method</b>     | Pos_5mins_MS.m      |
| <b>Comment</b>                |                            |                      |                     |

|                                  |                                                                                        |                                  |                                                          |
|----------------------------------|----------------------------------------------------------------------------------------|----------------------------------|----------------------------------------------------------|
| <b>Sample Group</b>              | <b>Info.</b>                                                                           |                                  |                                                          |
| <b>Walkup Sample Description</b> | 6MesCuSnPh3 + (p-tol)NCN(p-tol) after immediate quenching with wet acetonitrile (1 mL) | <b>Walkup Method</b>             | Pos_5Mins_C18                                            |
| <b>Formula</b>                   | C33H30N2Sn                                                                             | <b>Walkup Method Description</b> | Positive mode ionization using C18 column chromatography |
| <b>Stream Name</b>               | LC 1                                                                                   | <b>Acquisition SW Version</b>    | 6200 series TOF/6500 series Q-TOF B.09.00 (B9044.0)      |

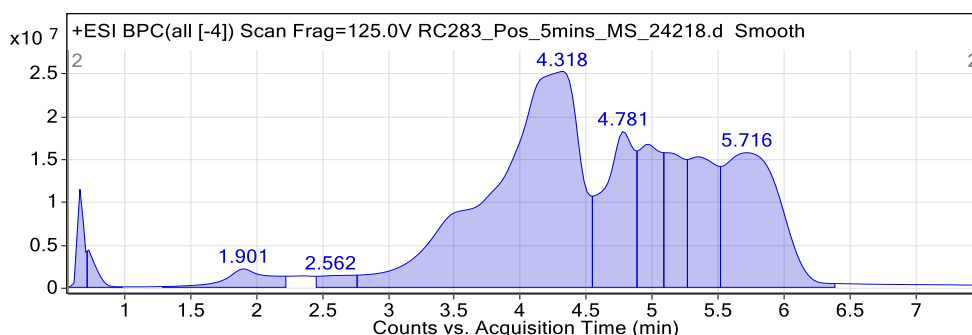

Figure 1: Base peak chromatogram

## User Chromatogram Peak List

| RT (min) | Area       | Area % | Area Sum (%) | Base Peak (m/z) | Width (min) |
|----------|------------|--------|--------------|-----------------|-------------|
| 0.67     | 40339458   | 3.40   | 1.51         | 144.9814        | 0.064       |
| 0.72     | 20454386   | 1.72   | 0.77         | 144.9811        | 0.078       |
| 1.90     | 51829830   | 4.37   | 1.94         | 108.0799        | 0.314       |
| 2.56     | 25517390   | 2.15   | 0.96         | 108.0799        | 0.259       |
| 4.32     | 1186228860 | 100.00 | 44.41        | 321.2365        | 0.589       |
| 4.78     | 292519704  | 24.66  | 10.95        | 500.2123        | 0.221       |
| 4.97     | 197955183  | 16.69  | 7.41         | 673.4456        | 0.165       |
| 5.18     | 165340310  | 13.94  | 6.19         | 321.2310        | 0.158       |
| 5.35     | 223100666  | 18.81  | 8.35         | 321.2310        | 0.218       |
| 5.72     | 467664038  | 39.42  | 17.51        | 321.2311        | 0.475       |

## Compound Table

| Compound Label       | RT (min) | Observed mass (m/z) | Neutral observed mass (Da) | Theoretical mass (Da) | Mass error (ppm) | Isotope match score (%) |
|----------------------|----------|---------------------|----------------------------|-----------------------|------------------|-------------------------|
| Cpd 1: C33 H30 N2 Sn | 4.28     | 575.1494            | 566.1440                   | 566.1457              | -3.07            | 64.15                   |

Mass errors of between -5.00 and 5.00 ppm with isotope match scores above 60% are considered confirmation of molecular formulae

## Walkup MS Report

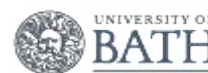

|                               |                            |                      |                      |
|-------------------------------|----------------------------|----------------------|----------------------|
| <b>Data File</b>              | RC193_Pos_5mins_MS_21775.d | <b>Sample Name</b>   | RC193                |
| <b>Sample Type</b>            | Sample                     | <b>Position</b>      | P1-A3                |
| <b>Instrument Name</b>        | 6545 QTof                  | <b>User Name</b>     | Laura English        |
| <b>Acq Method</b>             | Pos_5mins_MS.m             | <b>Acquired Time</b> | 8/24/2021 4:04:05 PM |
| <b>IRM Calibration Status</b> | Success                    | <b>DA Method</b>     | Pos_5mins_MS.m       |
| <b>Comment</b>                |                            |                      |                      |

|                                  |                  |                                  |                                                          |
|----------------------------------|------------------|----------------------------------|----------------------------------------------------------|
| <b>Sample Group</b>              |                  | <b>Info.</b>                     |                                                          |
| <b>Walkup Sample Description</b> | RC193 - C21H20N2 | <b>Walkup Method</b>             | Pos_5Mins_C18                                            |
| <b>Formula</b>                   | C21H20N2         | <b>Walkup Method Description</b> | Positive mode ionization using C18 column chromatography |
| <b>Stream Name</b>               | LC 1             | <b>Acquisition SW Version</b>    | 6200 series TOF/6500 series Q-TOF B.09.00 (B9044.0)      |

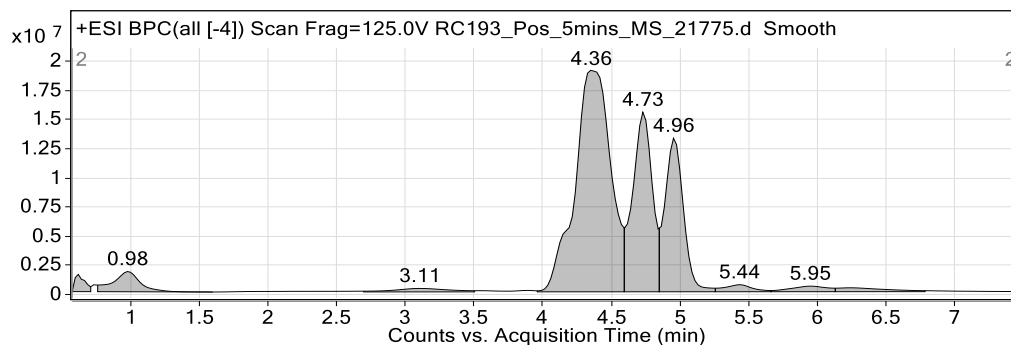

Figure 1: Base peak chromatogram

## User Chromatogram Peak List

| RT (min) | Area      | Area % | Area Sum (%) | Base Peak (m/z) | Width (min) |
|----------|-----------|--------|--------------|-----------------|-------------|
| 0.62     | 7457646   | 2.16   | 1.08         | 194.1179        | 0.080       |
| 0.98     | 23793281  | 6.91   | 3.46         | 225.1388        | 0.190       |
| 3.11     | 8395207   | 2.44   | 1.22         | 922.0090        | 0.410       |
| 4.36     | 344493708 | 100.00 | 50.10        | 321.2347        | 0.270       |
| 4.73     | 153228187 | 44.48  | 22.28        | 543.3586        | 0.150       |
| 4.96     | 124136599 | 36.03  | 18.05        | 337.2308        | 0.140       |
| 5.44     | 8658314   | 2.51   | 1.26         | 353.2669        | 0.200       |
| 5.95     | 9053976   | 2.63   | 1.32         | 125.9865        | 0.270       |
| 6.24     | 8450105   | 2.45   | 1.23         | 922.0107        | 0.360       |

## Compound Table

| Compound Label    | RT (min) | Observed mass (m/z) | Neutral observed mass (Da) | Theoretical mass (Da) | Mass error (ppm) | Isotope match score (%) |
|-------------------|----------|---------------------|----------------------------|-----------------------|------------------|-------------------------|
| Cpd 1: C21 H20 N2 | 4.16     | 301.1703            | 300.1630                   | 300.1626              | 1.09             | 99.21                   |

Mass errors of between -5.00 and 5.00 ppm with isotope match scores above 60% are considered confirmation of molecular formulae

## Walkup MS Report

|                               |                            |                      |                      |
|-------------------------------|----------------------------|----------------------|----------------------|
| <b>Data File</b>              | RC284_Pos_5mins_MS_24268.d | <b>Sample Name</b>   | RC284                |
| <b>Sample Type</b>            | Sample                     | <b>Position</b>      | P1-C4                |
| <b>Instrument Name</b>        | 6545 QTof                  | <b>User Name</b>     | Rex Charman          |
| <b>Acq Method</b>             | Pos_5mins_MS.m             | <b>Acquired Time</b> | 12/6/2021 1:15:54 PM |
| <b>IRM Calibration Status</b> | Success                    | <b>DA Method</b>     | Pos_5mins_MS.m       |
| <b>Comment</b>                |                            |                      |                      |

|                                  |                                                                      |                                  |                                                          |
|----------------------------------|----------------------------------------------------------------------|----------------------------------|----------------------------------------------------------|
| <b>Sample Group</b>              |                                                                      | <b>Info.</b>                     |                                                          |
| <b>Walkup Sample Description</b> | 6MesCuSnPh3 + PhNCO, after immediate quenching with wet acetonitrile | <b>Walkup Method</b>             | Pos_5Mins_C18                                            |
| <b>Formula</b>                   | C25H21NOSn                                                           | <b>Walkup Method Description</b> | Positive mode ionization using C18 column chromatography |
| <b>Stream Name</b>               | LC 1                                                                 | <b>Acquisition SW Version</b>    | 6200 series TOF/6500 series Q-TOF B.09.00 (B9044.0)      |

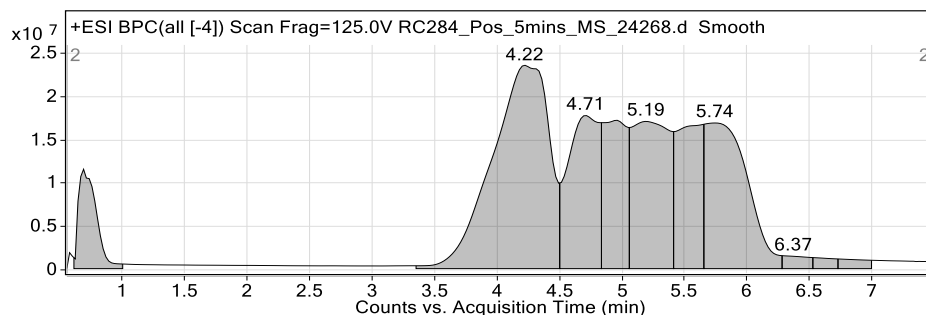

Figure 1: Base peak chromatogram

### User Chromatogram Peak List

| RT (min) | Area      | Area % | Area Sum (%) | Base Peak (m/z) | Width (min) |
|----------|-----------|--------|--------------|-----------------|-------------|
| 0.69     | 114879329 | 15.39  | 4.73         | 144.9813        | 0.140       |
| 4.22     | 746362715 | 100.00 | 30.72        | 321.2334        | 0.420       |
| 4.71     | 306886689 | 41.12  | 12.63        | 321.2311        | 0.250       |
| 4.95     | 225090884 | 30.16  | 9.26         | 673.4443        | 0.170       |
| 5.19     | 351586829 | 47.11  | 14.47        | 321.2308        | 0.310       |
| 5.52     | 237368520 | 31.80  | 9.77         | 321.2307        | 0.210       |
| 5.74     | 395892932 | 53.04  | 16.29        | 321.2308        | 0.390       |
| 6.37     | 20465789  | 2.74   | 0.84         | 337.2239        | 0.210       |
| 6.59     | 14378769  | 1.93   | 0.59         | 337.2236        | 0.160       |
| 6.75     | 16652255  | 2.23   | 0.69         | 337.2238        | 0.210       |

### Compound Table

| Compound Label        | RT (min) | Observed mass (m/z) | Neutral observed mass (Da) | Theoretical mass (Da) | Mass error (ppm) | Isotope match score (%) | Error flag  |
|-----------------------|----------|---------------------|----------------------------|-----------------------|------------------|-------------------------|-------------|
| Cpd 1: C25 H21 N O Sn | 0.58     | 494.0531            | 463.0675                   | 463.0671              | 0.76             | 71.15                   | No H adduct |

Mass errors of between -5.00 and 5.00 ppm with isotope match scores above 60% are considered confirmation of molecular formulae

## walkup MS Report

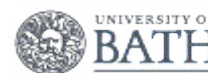

|                               |                                          |                      |                       |
|-------------------------------|------------------------------------------|----------------------|-----------------------|
| <b>Data File</b>              | 6MesCuSnPh3 + PhNCO_Pos_5mins_MS_21586.d | <b>Sample Name</b>   | 6MesCuSnPh3 + PhNCO   |
| <b>Sample Type</b>            | Sample                                   | <b>Position</b>      | P1-A3                 |
| <b>Instrument Name</b>        | 6545 QTof                                | <b>User Name</b>     | Thomas Horsley Downie |
| <b>Acq Method</b>             | Pos_5mins_MS.m                           | <b>Acquired Time</b> | 8/20/2021 6:57:49 PM  |
| <b>IRM Calibration Status</b> | Success                                  | <b>DA Method</b>     | Pos_5mins_MS.m        |
| <b>Comment</b>                |                                          |                      |                       |

|                                  |              |                                  |                                                          |
|----------------------------------|--------------|----------------------------------|----------------------------------------------------------|
| <b>Sample Group</b>              |              | <b>Info.</b>                     |                                                          |
| <b>Walkup Sample Description</b> | HN(Ph)C(O)Ph | <b>Walkup Method</b>             | Pos_5Mins_C18                                            |
| <b>Formula</b>                   | C13H11NO     | <b>Walkup Method Description</b> | Positive mode ionization using C18 column chromatography |
| <b>Stream Name</b>               | LC 1         | <b>Acquisition SW Version</b>    | 6200 series TOF/6500 series Q-TOF B.09.00 (B9044.0)      |

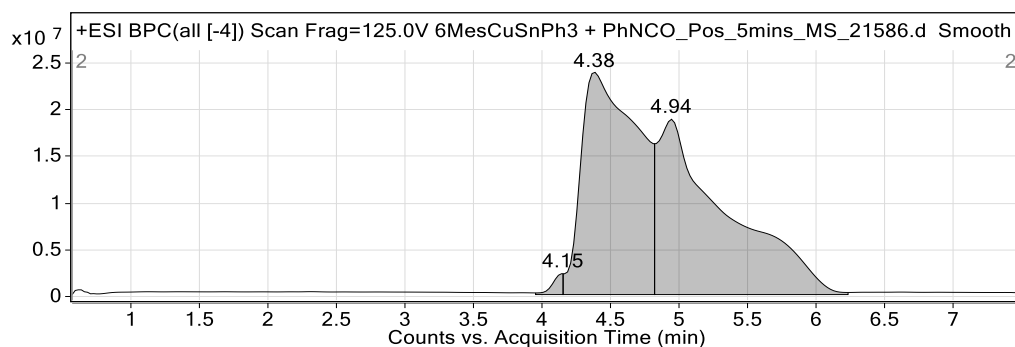

Figure 1: Base peak chromatogram

## User Chromatogram Peak List

| RT (min) | Area      | Area % | Area Sum (%) | Base Peak (m/z) | Width (min) |
|----------|-----------|--------|--------------|-----------------|-------------|
| 4.15     | 11734672  | 1.72   | 0.86         | 356.2124        | 0.080       |
| 4.38     | 682533166 | 100.00 | 50.25        | 321.2376        | 0.390       |
| 4.94     | 663909035 | 97.27  | 48.88        | 337.2317        | 0.450       |

## Compound Table

| Compound Label     | RT (min) | Observed mass (m/z) | Neutral observed mass (Da) | Theoretical mass (Da) | Mass error (ppm) | Isotope match score (%) |
|--------------------|----------|---------------------|----------------------------|-----------------------|------------------|-------------------------|
| Cpd 1: C13 H11 N O | 4.41     | 198.0914            | 197.0842                   | 197.0841              | 0.49             | 99.37                   |

Mass errors of between -5.00 and 5.00 ppm with isotope match scores above 60% are considered confirmation of molecular formulae



## Walkup MS Report



|                               |                                         |                      |                       |
|-------------------------------|-----------------------------------------|----------------------|-----------------------|
| <b>Data File</b>              | IprCuSnPh3 + PhNCO_Pos_5mins_MS_21582.d | <b>Sample Name</b>   | IprCuSnPh3 + PhNCO    |
| <b>Sample Type</b>            | Sample                                  | <b>Position</b>      | P1-A2                 |
| <b>Instrument Name</b>        | 6545 QTof                               | <b>User Name</b>     | Thomas Horsley Downie |
| <b>Acq Method</b>             | Pos_5mins_MS.m                          | <b>Acquired Time</b> | 8/20/2021 6:49:26 PM  |
| <b>IRM Calibration Status</b> | Success                                 | <b>DA Method</b>     | Pos_5mins_MS.m        |
| <b>Comment</b>                |                                         |                      |                       |

|                                  |              |                                  |                                                          |
|----------------------------------|--------------|----------------------------------|----------------------------------------------------------|
| <b>Sample Group</b>              |              | <b>Info.</b>                     |                                                          |
| <b>Walkup Sample Description</b> | HN(Ph)C(O)Ph | <b>Walkup Method</b>             | Pos_5Mins_C18                                            |
| <b>Formula</b>                   | C13H11NO     | <b>Walkup Method Description</b> | Positive mode ionization using C18 column chromatography |
| <b>Stream Name</b>               | LC 1         | <b>Acquisition SW Version</b>    | 6200 series TOF/6500 series Q-TOF B.09.00 (B9044.0)      |

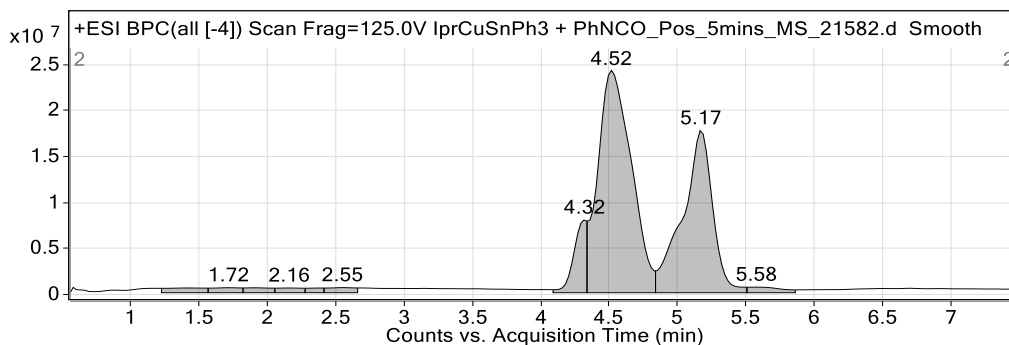

Figure 1: Base peak chromatogram

## User Chromatogram Peak List

| RT (min) | Area      | Area % | Area Sum (%) | Base Peak (m/z) | Width (min) |
|----------|-----------|--------|--------------|-----------------|-------------|
| 1.42     | 10176856  | 2.47   | 1.29         | 101.0042        | 0.270       |
| 1.72     | 7996225   | 1.94   | 1.02         | 101.0039        | 0.210       |
| 1.91     | 7176305   | 1.74   | 0.91         | 101.0039        | 0.180       |
| 2.16     | 6669473   | 1.62   | 0.85         | 101.0037        | 0.190       |
| 2.40     | 4144636   | 1.01   | 0.53         | 101.0038        | 0.120       |
| 2.55     | 7802049   | 1.90   | 0.99         | 101.0035        | 0.200       |
| 4.32     | 50962331  | 12.38  | 6.47         | 351.0205        | 0.100       |
| 4.52     | 411599473 | 100.00 | 52.28        | 389.3022        | 0.250       |
| 5.17     | 270428449 | 65.70  | 34.35        | 405.2953        | 0.220       |
| 5.58     | 10372874  | 2.52   | 1.32         | 389.2963        | 0.260       |

## Compound Table

| Compound Label     | RT (min) | Observed mass (m/z) | Neutral observed mass (Da) | Theoretical mass (Da) | Mass error (ppm) | Isotope match score (%) |
|--------------------|----------|---------------------|----------------------------|-----------------------|------------------|-------------------------|
| Cpd 1: C13 H11 N O | 4.41     | 198.0914            | 197.0842                   | 197.0841              | 0.47             | 99.51                   |

Mass errors of between -5.00 and 5.00 ppm with isotope match scores above 60% are considered confirmation of molecular formulae

## Walkup MS Report

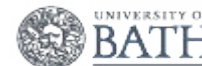

|                               |                            |                      |                       |
|-------------------------------|----------------------------|----------------------|-----------------------|
| <b>Data File</b>              | RC184_Pos_5mins_MS_21531.d | <b>Sample Name</b>   | RC184                 |
| <b>Sample Type</b>            | Sample                     | <b>Position</b>      | P1-A3                 |
| <b>Instrument Name</b>        | 6545 QToF                  | <b>User Name</b>     | Thomas Horsley Downie |
| <b>Acq Method</b>             | Pos_5mins_MS.m             | <b>Acquired Time</b> | 19/08/2021 15:50:02   |
| <b>IRM Calibration Status</b> | Success                    | <b>DA Method</b>     | Pos_5mins_MS.m        |
| <b>Comment</b>                |                            |                      |                       |

|                                  |                                                               |                                  |                                                          |
|----------------------------------|---------------------------------------------------------------|----------------------------------|----------------------------------------------------------|
| <b>Sample Group</b>              |                                                               | <b>Info.</b>                     |                                                          |
| <b>Walkup Sample Description</b> | (PhNCO) <sub>3</sub>                                          | <b>Walkup Method</b>             | Pos_5Mins_C18                                            |
| <b>Formula</b>                   | C <sub>21</sub> H <sub>15</sub> N <sub>3</sub> O <sub>3</sub> | <b>Walkup Method Description</b> | Positive mode ionization using C18 column chromatography |
| <b>Stream Name</b>               | LC 1                                                          | <b>Acquisition SW Version</b>    | 6200 series TOF/6500 series Q-TOF B.09.00 (B9044.0)      |

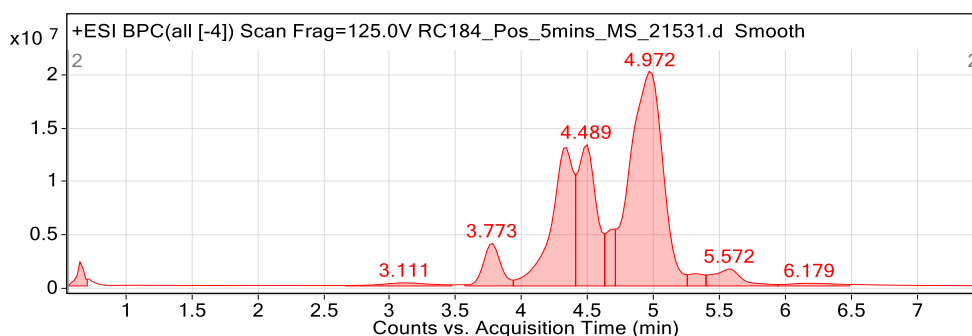

Figure 1: Base peak chromatogram

## User Chromatogram Peak List

| RT (min) | Area      | Area % | Area Sum (%) | Base Peak (m/z) | Width (min) |
|----------|-----------|--------|--------------|-----------------|-------------|
| 0.66     | 8375296   | 2.44   | 1.13         | 123.0915        | 0.061       |
| 3.11     | 7708273   | 2.24   | 1.04         | 922.0078        | 0.397       |
| 3.77     | 36354397  | 10.58  | 4.89         | 122.0600        | 0.139       |
| 4.33     | 152699047 | 44.43  | 20.56        | 321.2341        | 0.170       |
| 4.49     | 128889487 | 37.50  | 17.35        | 440.2729        | 0.147       |
| 4.70     | 25044997  | 7.29   | 3.37         | 342.1240        | 0.065       |
| 4.97     | 343683561 | 100.00 | 46.27        | 337.2311        | 0.246       |
| 5.32     | 9323880   | 2.71   | 1.26         | 400.2384        | 0.114       |
| 5.57     | 24381139  | 7.09   | 3.28         | 351.0192        | 0.212       |
| 6.18     | 6385758   | 1.86   | 0.86         | 922.0085        | 0.408       |

## Compound Table

| Compound Label                                                       | RT (min) | Observed mass (m/z) | Neutral observed mass (Da) | Theoretical mass (Da) | Mass error (ppm) | Isotope match score (%) |
|----------------------------------------------------------------------|----------|---------------------|----------------------------|-----------------------|------------------|-------------------------|
| Cpd 1: C <sub>21</sub> H <sub>15</sub> N <sub>3</sub> O <sub>3</sub> | 4.36     | 358.1188            | 357.1114                   | 357.1113              | 0.29             | 96.94                   |

Mass errors of between -5.00 and 5.00 ppm with isotope match scores above 60% are considered confirmation of molecular formulae

## Walkup MS Report



|                               |                            |                      |                     |
|-------------------------------|----------------------------|----------------------|---------------------|
| <b>Data File</b>              | RC285_Pos_5mins_MS_24224.d | <b>Sample Name</b>   | RC285               |
| <b>Sample Type</b>            | Sample                     | <b>Position</b>      | P1-A4               |
| <b>Instrument Name</b>        | 6545 QToF                  | <b>User Name</b>     | Rex Charman         |
| <b>Acq Method</b>             | Pos_5mins_MS.m             | <b>Acquired Time</b> | 06/12/2021 11:25:49 |
| <b>IRM Calibration Status</b> | Success                    | <b>DA Method</b>     | Pos_5mins_MS.m      |
| <b>Comment</b>                |                            |                      |                     |

|                                  |                                                         |                                  |                                                          |
|----------------------------------|---------------------------------------------------------|----------------------------------|----------------------------------------------------------|
| <b>Sample Group</b>              |                                                         | <b>Info.</b>                     |                                                          |
| <b>Walkup Sample Description</b> | 6MesCuSnPh3 + PhNCS, after 30 minutes, orange solution. | <b>Walkup Method</b>             | Pos_5Mins_C18                                            |
| <b>Formula</b>                   | C25H21NSnS                                              | <b>Walkup Method Description</b> | Positive mode ionization using C18 column chromatography |
| <b>Stream Name</b>               | LC 1                                                    | <b>Acquisition SW Version</b>    | 6200 series TOF/6500 series Q-TOF B.09.00 (B9044.0)      |

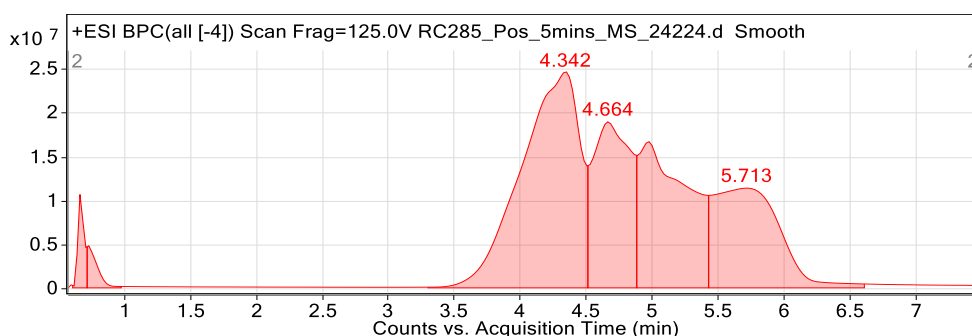

Figure 1: Base peak chromatogram

## User Chromatogram Peak List

| RT (min) | Area      | Area % | Area Sum (%) | Base Peak (m/z) | Width (min) |
|----------|-----------|--------|--------------|-----------------|-------------|
| 0.67     | 35393388  | 4.66   | 1.76         | 144.9815        | 0.055       |
| 0.72     | 24814410  | 3.27   | 1.23         | 144.9812        | 0.086       |
| 4.34     | 759039911 | 100.00 | 37.69        | 321.2354        | 0.400       |
| 4.66     | 370275236 | 48.78  | 18.38        | 486.1966        | 0.269       |
| 4.97     | 425038382 | 56.00  | 21.10        | 673.4462        | 0.331       |
| 5.71     | 399517377 | 52.63  | 19.84        | 321.2304        | 0.537       |

## Compound Table

| Compound Label        | RT (min) | Observed mass (m/z) | Neutral observed mass (Da) | Theoretical mass (Da) | Mass error (ppm) | Isotope match score (%) |
|-----------------------|----------|---------------------|----------------------------|-----------------------|------------------|-------------------------|
| Cpd 1: C25 H21 N S Sn | 5.45     | 488.0491            | 479.0463                   | 479.0443              | 4.25             | 68.09                   |

Mass errors of between -5.00 and 5.00 ppm with isotope match scores above 60% are considered confirmation of molecular formulae

## Walkup MS Report



|                               |                            |                      |                       |
|-------------------------------|----------------------------|----------------------|-----------------------|
| <b>Data File</b>              | RC194_Neg_5mins_MS_21878.d | <b>Sample Name</b>   | RC194                 |
| <b>Sample Type</b>            | Sample                     | <b>Position</b>      | P1-B1                 |
| <b>Instrument Name</b>        | 6545 QTof                  | <b>User Name</b>     | Thomas Horsley Downie |
| <b>Acq Method</b>             | Neg_5mins_MS.m             | <b>Acquired Time</b> | 8/27/2021 1:32:43 PM  |
| <b>IRM Calibration Status</b> | Success                    | <b>DA Method</b>     | Neg_5mins_MS.m        |
| <b>Comment</b>                |                            |                      |                       |

|                                  |                                      |                                  |                                                          |
|----------------------------------|--------------------------------------|----------------------------------|----------------------------------------------------------|
| <b>Sample Group</b>              |                                      | <b>Info.</b>                     |                                                          |
| <b>Walkup Sample Description</b> | After overnight RT - orange solution | <b>Walkup Method</b>             | Neg_5Mins_C18                                            |
| <b>Formula</b>                   | C13H11NS                             | <b>Walkup Method Description</b> | Negative mode ionization using C18 column chromatography |
| <b>Stream Name</b>               | LC 1                                 | <b>Acquisition SW Version</b>    | 6200 series TOF/6500 series Q-TOF B.09.00 (B9044.0)      |

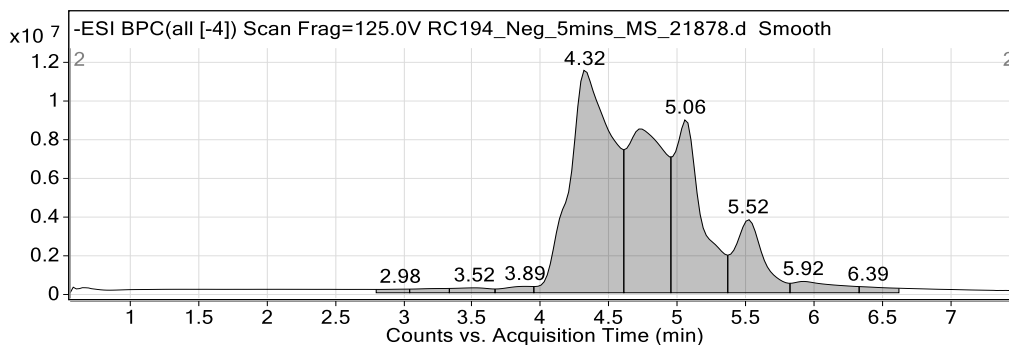

Figure 1: Base peak chromatogram

## User Chromatogram Peak List

| RT (min) | Area      | Area % | Area Sum (%) | Base Peak (m/z) | Width (min) |
|----------|-----------|--------|--------------|-----------------|-------------|
| 2.98     | 2634082   | 1.05   | 0.42         | 134.8656        | 0.190       |
| 3.20     | 3648504   | 1.46   | 0.58         | 134.8655        | 0.240       |
| 3.52     | 4693033   | 1.87   | 0.75         | 134.8657        | 0.280       |
| 3.89     | 4798245   | 1.91   | 0.76         | 134.8657        | 0.220       |
| 4.32     | 250645116 | 100.00 | 39.94        | 441.0167        | 0.290       |
| 4.73     | 161914350 | 64.60  | 25.80        | 441.0165        | 0.290       |
| 5.06     | 125953000 | 50.25  | 20.07        | 311.2032        | 0.200       |
| 5.52     | 54922585  | 21.91  | 8.75         | 293.1799        | 0.210       |
| 5.92     | 13637659  | 5.44   | 2.17         | 134.8662        | 0.310       |
| 6.39     | 4754301   | 1.90   | 0.76         | 134.8660        | 0.210       |

## Compound Table

| Compound Label     | RT (min) | Observed mass (m/z) | Neutral observed mass (Da) | Theoretical mass (Da) | Mass error (ppm) | Isotope match score (%) |
|--------------------|----------|---------------------|----------------------------|-----------------------|------------------|-------------------------|
| Cpd 1: C13 H11 N S | 4.55     | 212.0541            | 213.0613                   | 213.0612              | 0.48             | 98.77                   |

Mass errors of between -5.00 and 5.00 ppm with isotope match scores above 60% are considered confirmation of molecular formulae

## References

1. L. R. Collins, I. M. Riddlestone, M. F. Mahon, M. K. Whittlesey, *Chem. - Eur. J.*, 2015, **21**, 14075–14084; J. W. Hall, D. M. L. Unson, P. Brunel, L. R. Collins, M. K. Cybulski, M. F. Mahon, and M. K. Whittlesey, *Organometallics*, 2018, **37**, 3102–3110; A. J. Jordan, C. M. Wyss, J. Bacsá, and J. P. Sadighi, *Organometallics*, 2016, **35**, 5, 613–616.
2. O. V. Dolomanov, L. J. Bourhis, R. J. Gildea, J. A. K. Howard and H. Puschmann, *J. Appl. Cryst.*, 2009, **42**, 339–341.
3. G. Sheldrick, *Acta Cryst. A*, 2015, **71**, 3–8.
4. K. X. Bhattacharyya, J. A. Akana, D. S. Laitar, J. M. Berlin, and J. P. Sadighi, *Organometallics*, 2008, **27**, 12, 2682–2684.
5. B. Wrackmeyer, *Annu. Rep. NMR Spectrosc.*, 1999, **38**, 203–264; N. R. Neale and T. D. Tilley, *J. Am. Chem. Soc.*, 2005, **127**, 14745–14755; U. Englisch, K. Ruhlandt-Senge, F. Uhlig, *J. Organomet. Chem.*, 2000, **613**, 139–147.
